# Supplementary material for: Spontaneously evolved progenitor niches escape Yap oncogene addiction in advanced pancreatic ductal adenocarcinomas
Source: PubMed Central journal article supplement (PMC10017707; doi:10.1038/s41467-023-37147-y), 2023-03-15
Supplement: 41467_2023_37147_MOESM1_ESM.pdf [file 41467_2023_37147_MOESM1_ESM.pdf]

## **Supplementary Information**

# **Spontaneously Evolved Progenitor Niches Escape Yap Oncogene Addiction in Advanced Pancreatic Ductal Adenocarcinomas**

**Shigekazu Murakami, Shannon M White, Alec T McIntosh, Chan D.K. Nguyen, and  
Chunling Yi**

# Supplementary Figure 1

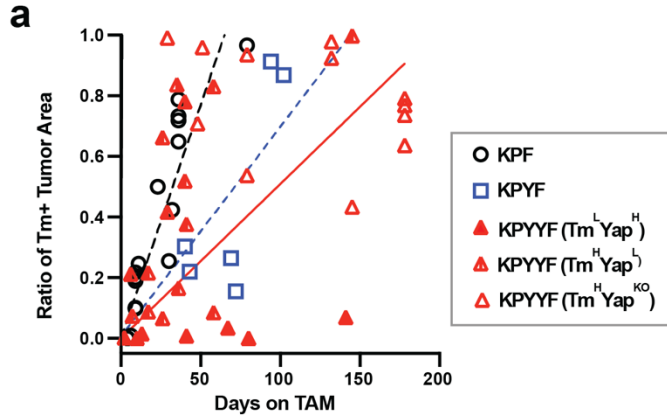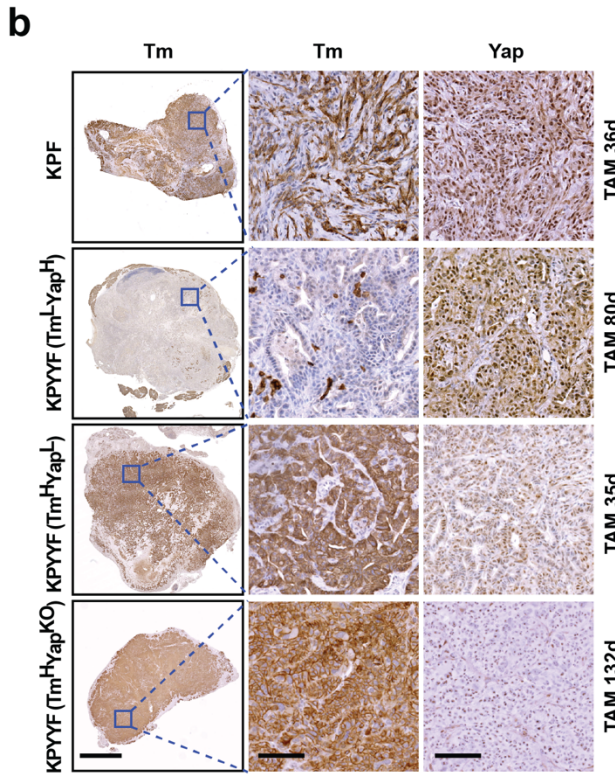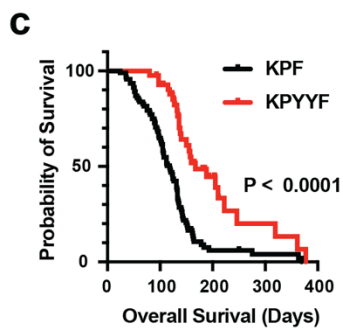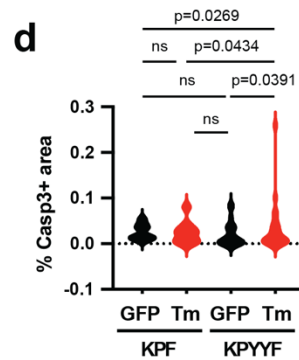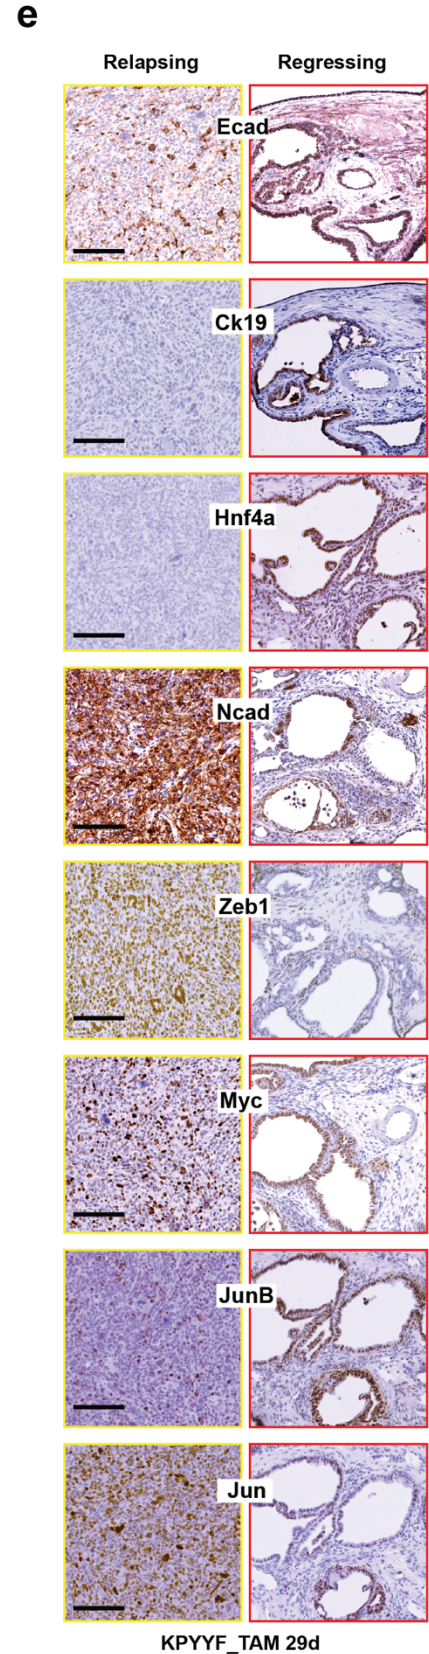

**Supplementary Figure 1. TAM treatment prolongs the survival of tumor-bearing mice**

**despite divergent rates of Yap ablation. a.** Scatter plot showing the tumor recombination rates

calculated by dividing Tm<sup>+</sup> area over Tm<sup>+</sup> and GFP<sup>+</sup> area and the corresponding days of TAM treatment of individual KPF, KPYF and KPYYF mice. Symbols represent genotypes whether KPF (circle), KPYF (square), or KPYYF (triangle). KPYY tumors are further grouped into three classes: Tm<sup>L</sup>Yap<sup>H</sup> (low percentages of Tm<sup>+</sup> cells and high Yap expression; filled triangle), Tm<sup>H</sup>Yap<sup>L</sup> (high percentages of Tm<sup>+</sup> cells with low Yap expression; half-filled triangle), and Tm<sup>H</sup>Yap<sup>KO</sup> (high percentages of Tm<sup>+</sup> cells with complete knockout Yap; open triangle).

Trendlines indicate the average changes in recombination rates over time among KPF (black dash), KPYF (blue dash), and all of the KPYYF mice (red lines), respectively. **b.** Representative

IHC images for Yap and Tm in PDAC tumors from KPF and the three major types of KPYYF mice. The days of TAM treatment for individual mice were shown at the bottom of images. Scale bars indicate 250  $\mu$ m (left) or 100  $\mu$ m (middle, right). Experiments were performed on KPF (n=9), KPYYF (Tm<sup>L</sup>Yap<sup>H</sup>; n=6), KPYYF (Tm<sup>H</sup>Yap<sup>L</sup>; n=11), and KPYYF (Tm<sup>H</sup>Yap<sup>KO</sup>; n=7). **c.**

Kaplan-Meier survival curve from KPF (n = 42) and KPYYF (n = 92) mice. Mantel-Cox Long Rank test. **d.** Percentage of CC3<sup>+</sup> area within GFP<sup>+</sup> or Tm<sup>+</sup> areas in KPF (n = 9) and KPYYF (Tm<sup>H</sup>Yap<sup>L</sup> and Tm<sup>H</sup>Yap<sup>KO</sup>; n = 15) tumors. Unpaired, one-tailed, Student's t-test. **e.**

Representative IHC images of indicated antibodies at relapsing (yellow) and regressing (red) regions of a KPYYF PDAC tumor after 29 days of TAM treatment matching Figure 1c. Scale bars indicate 50  $\mu$ m. Experiments were performed on at 13 different KPYY mice. Source data are provided as a Source Data file.

# Supplementary Figure 2

**a**

## FACS Gating Strategy

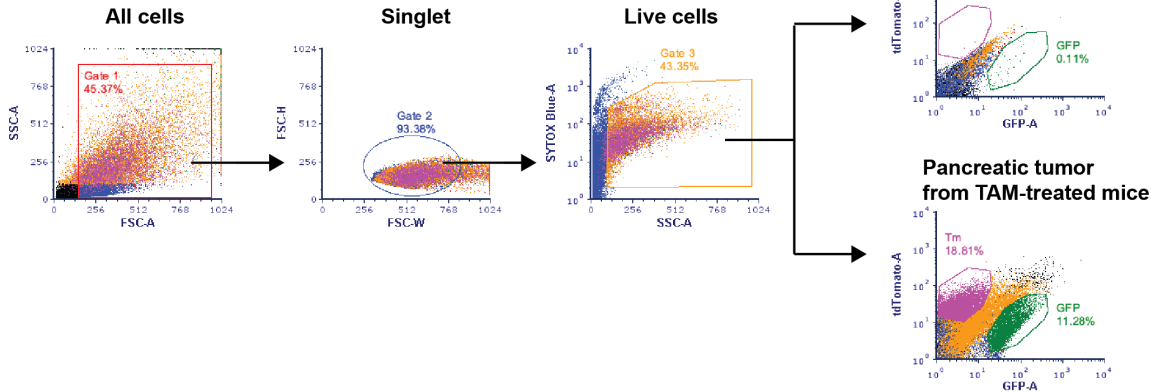

**b**

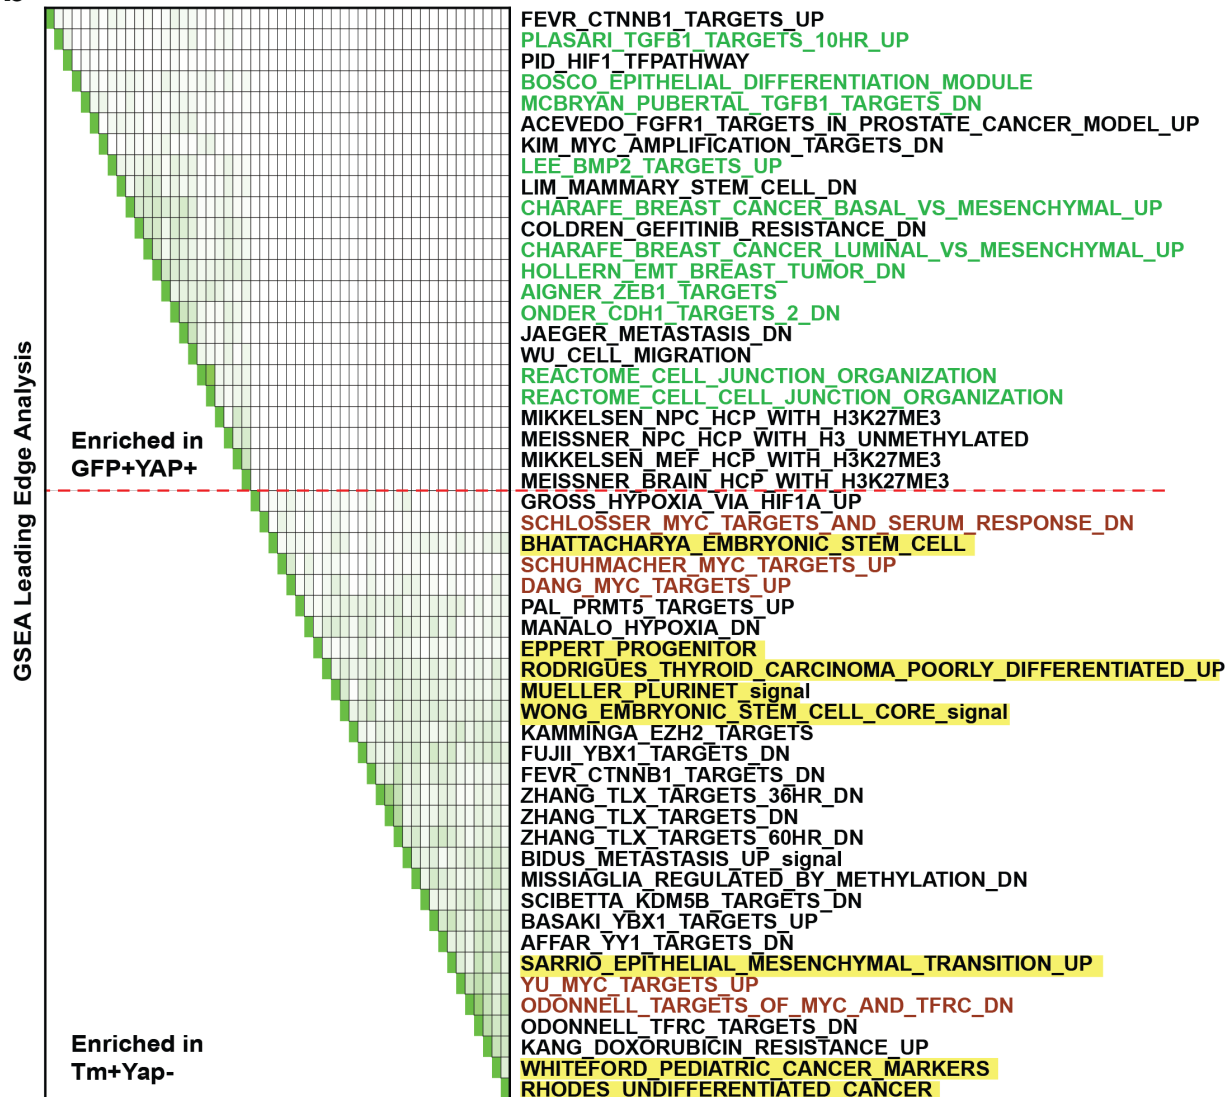



## Supplementary Figure 2

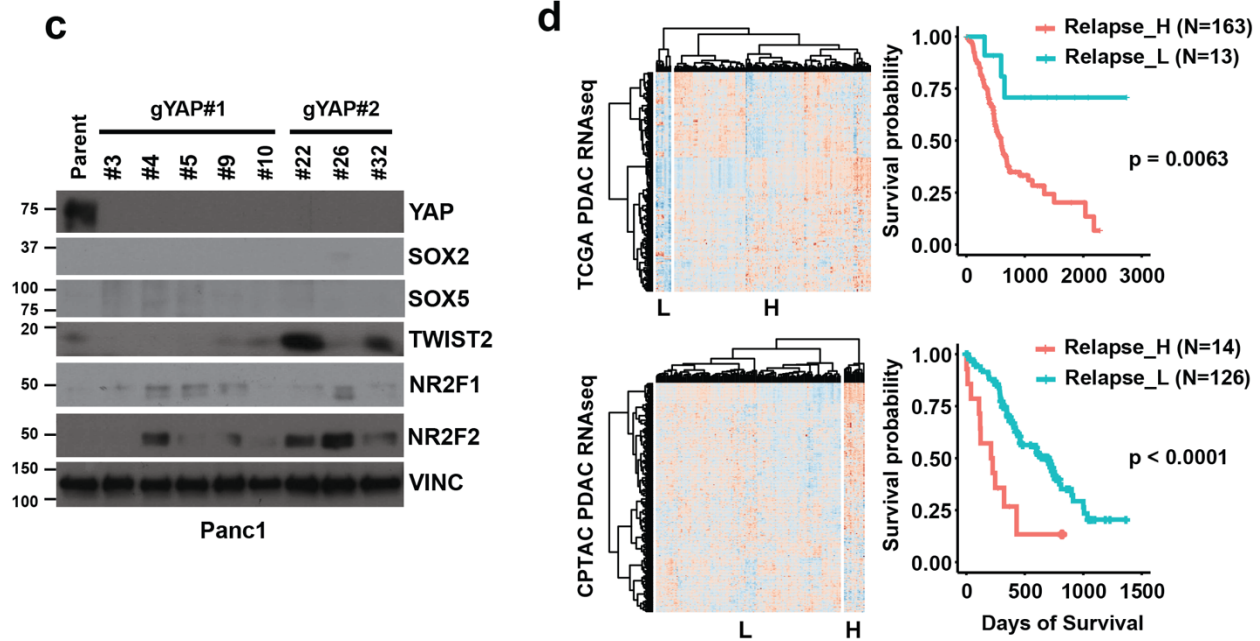

**Supplementary Figure 2. The gene signature upregulated in relapsed KPYYF tumors is correlated with worse survival in human PDAC patients.** **a.** Gating strategy for fluorescence-activated cell sorting (FACS) of GFP<sup>+</sup> or Tm<sup>+</sup> PDAC cells from the pancreata of KPF or KPYYF mice. **b.** Leading-edge analysis of the top-enriched Gene Sets in Tm<sup>+</sup>/Yap<sup>-</sup> or GFP<sup>+</sup>/Yap<sup>+</sup> PDAC cells according to GSEA from Figure 1d. Gene Sets related to epithelial differentiation and cell-cell junctions are colored in green; Gene Sets related to Myc targets are colored in brown; Gene Sets related to pluripotent/progenitor and embryonic stem cells, undifferentiation and EMT are highlighted in yellow. **c.** WB analysis of indicated proteins in parental human Panc1 cells or YAP CRISPR knockout clones generated using two different YAP gRNAs (gYAP #1 and #2). Vinc was used as the loading control. Shown is representative of three independent experiments. **d.** Left: Heatmaps depicting results from unsupervised clustering of TCGA (top; n = 176) and CPTAC (bottom: n = 140) PDAC tumors based on the mRNA expression of Yap-KO relapse-associated genes identified by RNA-seq of Tm<sup>+</sup>/Yap<sup>-</sup> and

GFP+/Yap+ murine PDAC cells from Figure 1d (right). Right: Kaplan Meier survival analysis of TCGA (top) and CPTAC (bottom) PDAC patients expressing high (H) or low (L) levels of Yap-KO relapse-associated genes. TCGA (top): Relapse\_H (n=163) and Relapse\_L (n=13), and CPTAC (bottom): Relapse\_H (n=14) and Relapse\_L (n=126), respectively. Mantel-Cox Long Rank test. Source data are provided as a Source Data file.

# Supplementary Figure S3

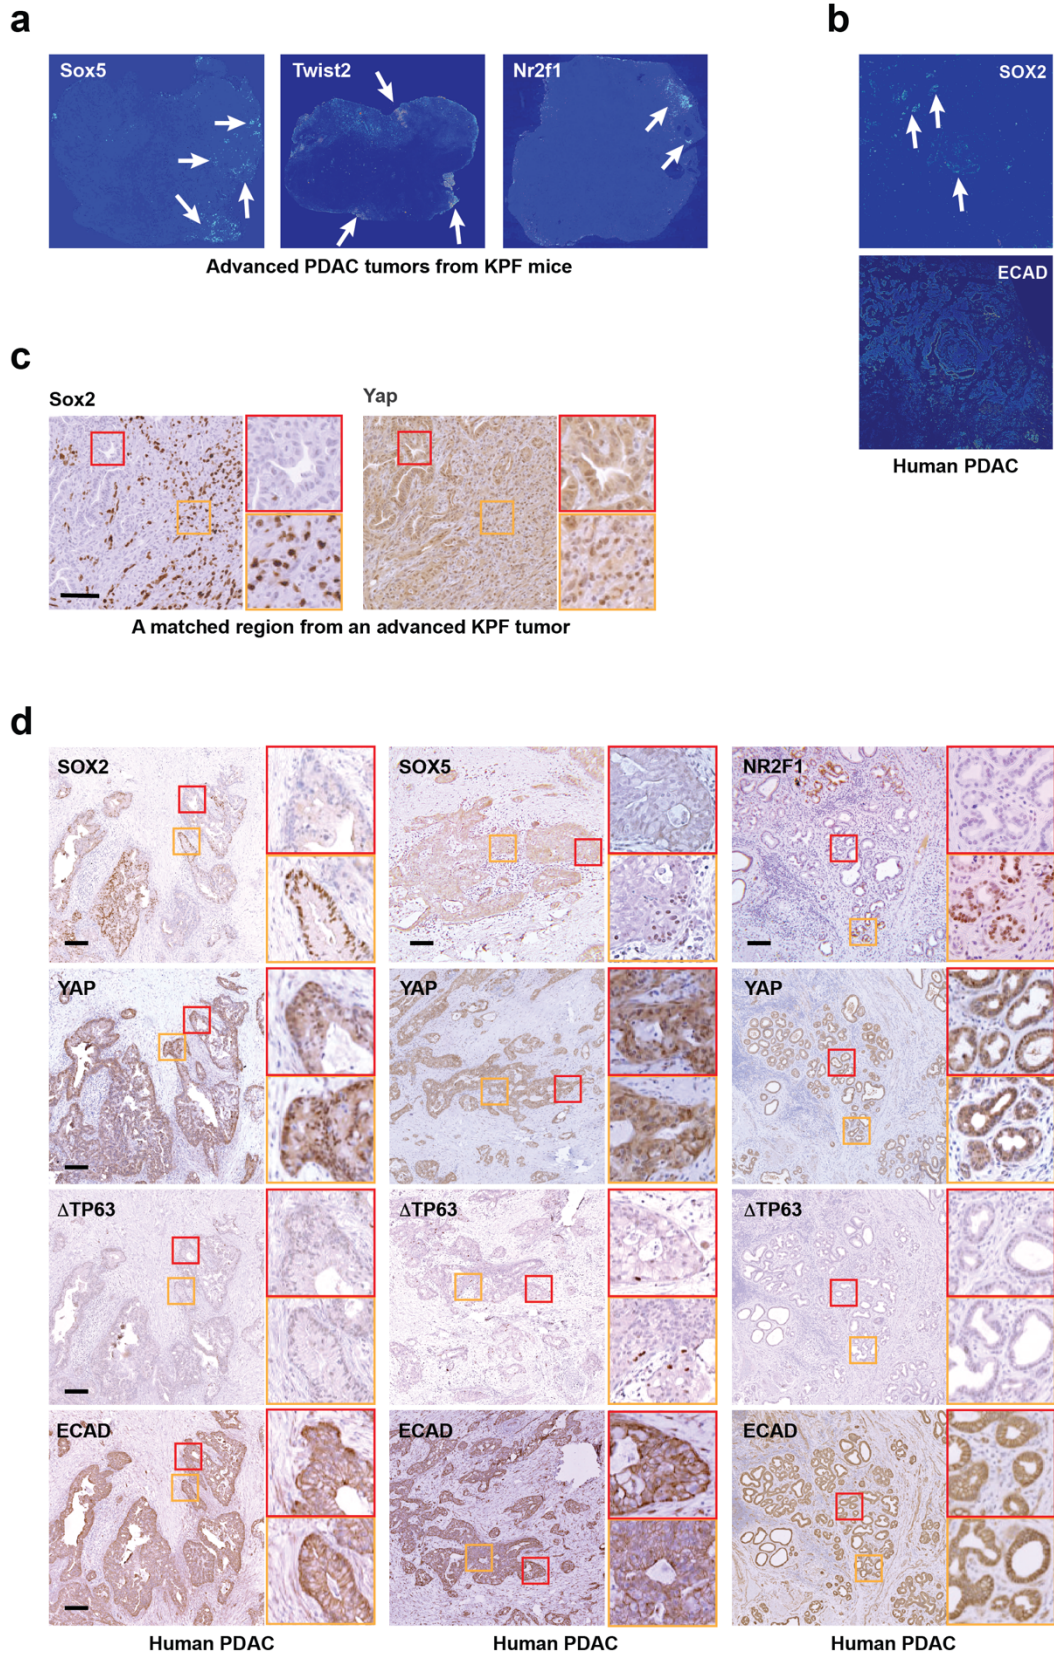

**Supplementary Figure 3. PTF-expressing progenitor niches are present in both advanced murine and human PDAC tumors.** **a.** Heatmaps of representative IHC staining of Sox5, Twist2, and Nr2f1 in three different advanced PDAC tumors from KPF mice. **b.** Heatmaps of representative IHC staining of SOX2 and ECAD at a matched region of an invasive PDAC tumor from a human patient. **c.** IHC images of Sox2 and Yap at a matched region of advanced PDAC tumor from a KPF mouse with two boxes marking two representative Sox2<sup>+</sup> (yellow) and Sox2<sup>-</sup> (red) subregions. Scale bar indicates 200  $\mu$ m. IHC staining for the same set of antibodies was performed on 16 different mice. **d.** IHC images of SOX2, SOX5 and NR2F1 with matching images of YAP,  $\Delta$ TP63 and ECAD at different regions of an invasive PDAC tumor from a human patient. IHC staining for the same set of antibodies was performed on five human PDAC tumor samples. Scale bar indicates 100  $\mu$ m.



## Supplementary Figure 4

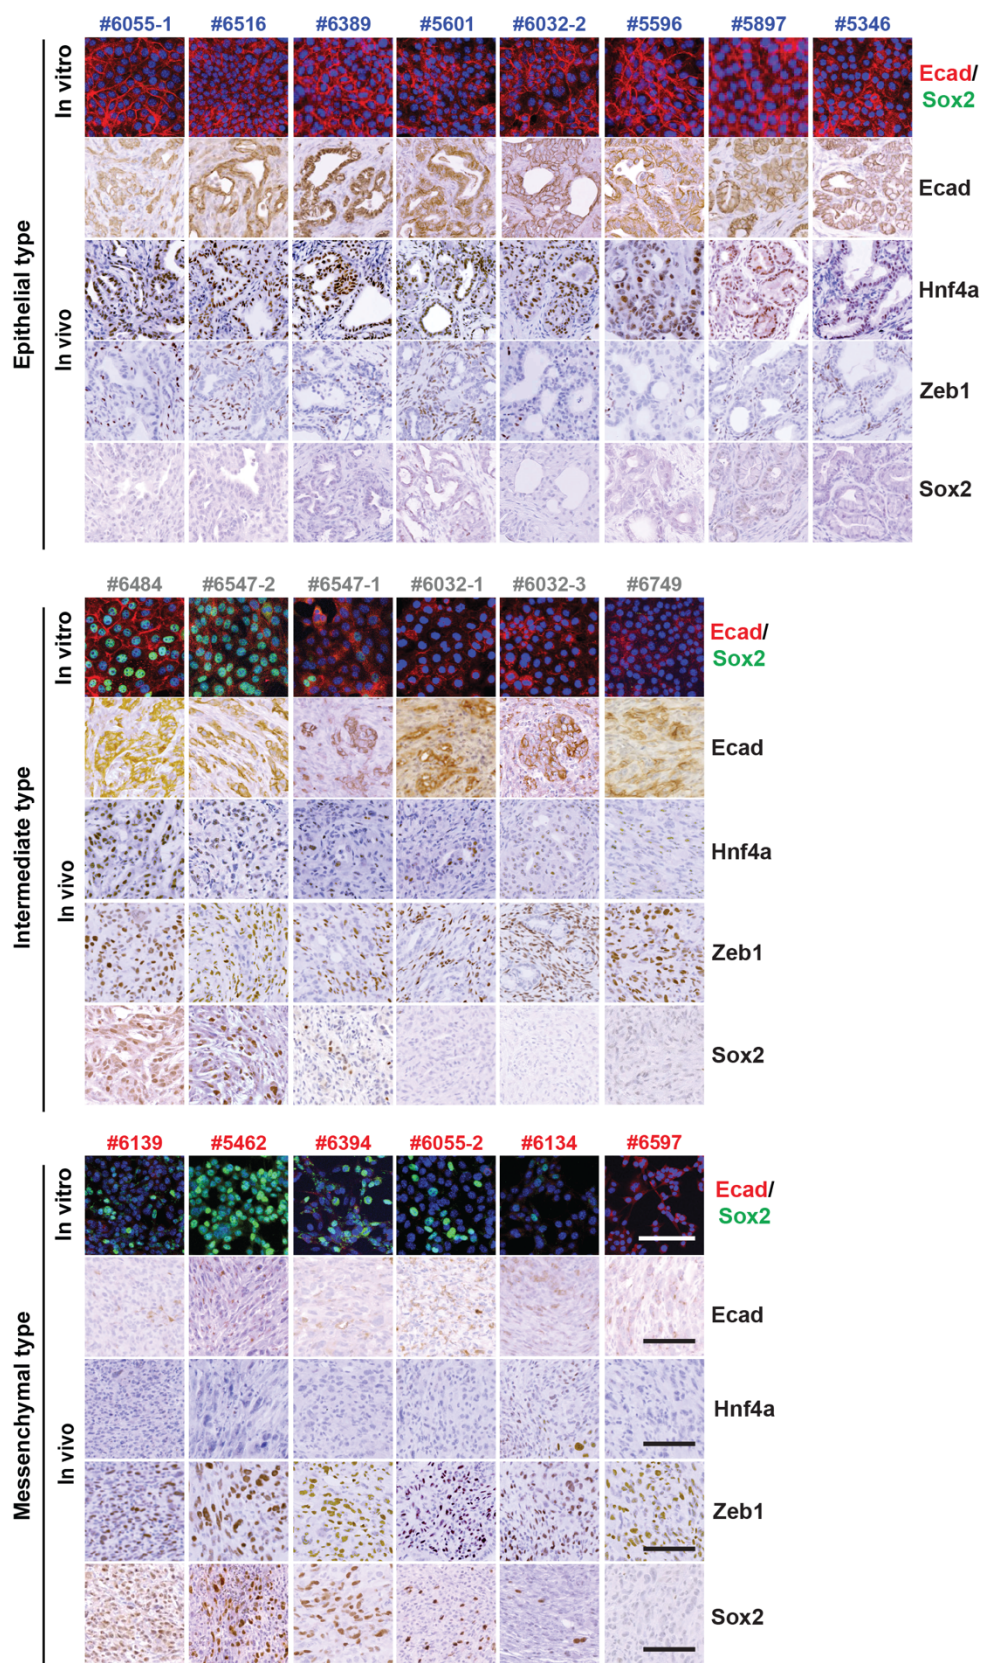



**Supplementary Figure 4. PTF expression is associated with EMT.** Representative images from IF (top panel) analysis of primary PDAC cell lines against Ecad (red) and Sox2 (green) and from IHC analysis of the corresponding primary PDAC tumors with indicated antibodies. N= 8, 6 and 6 mice for Epithelial, Intermediate, and Mesenchymal groups, respectively. Scale bars indicate 100  $\mu$ m.

# Supplementary Figure 5

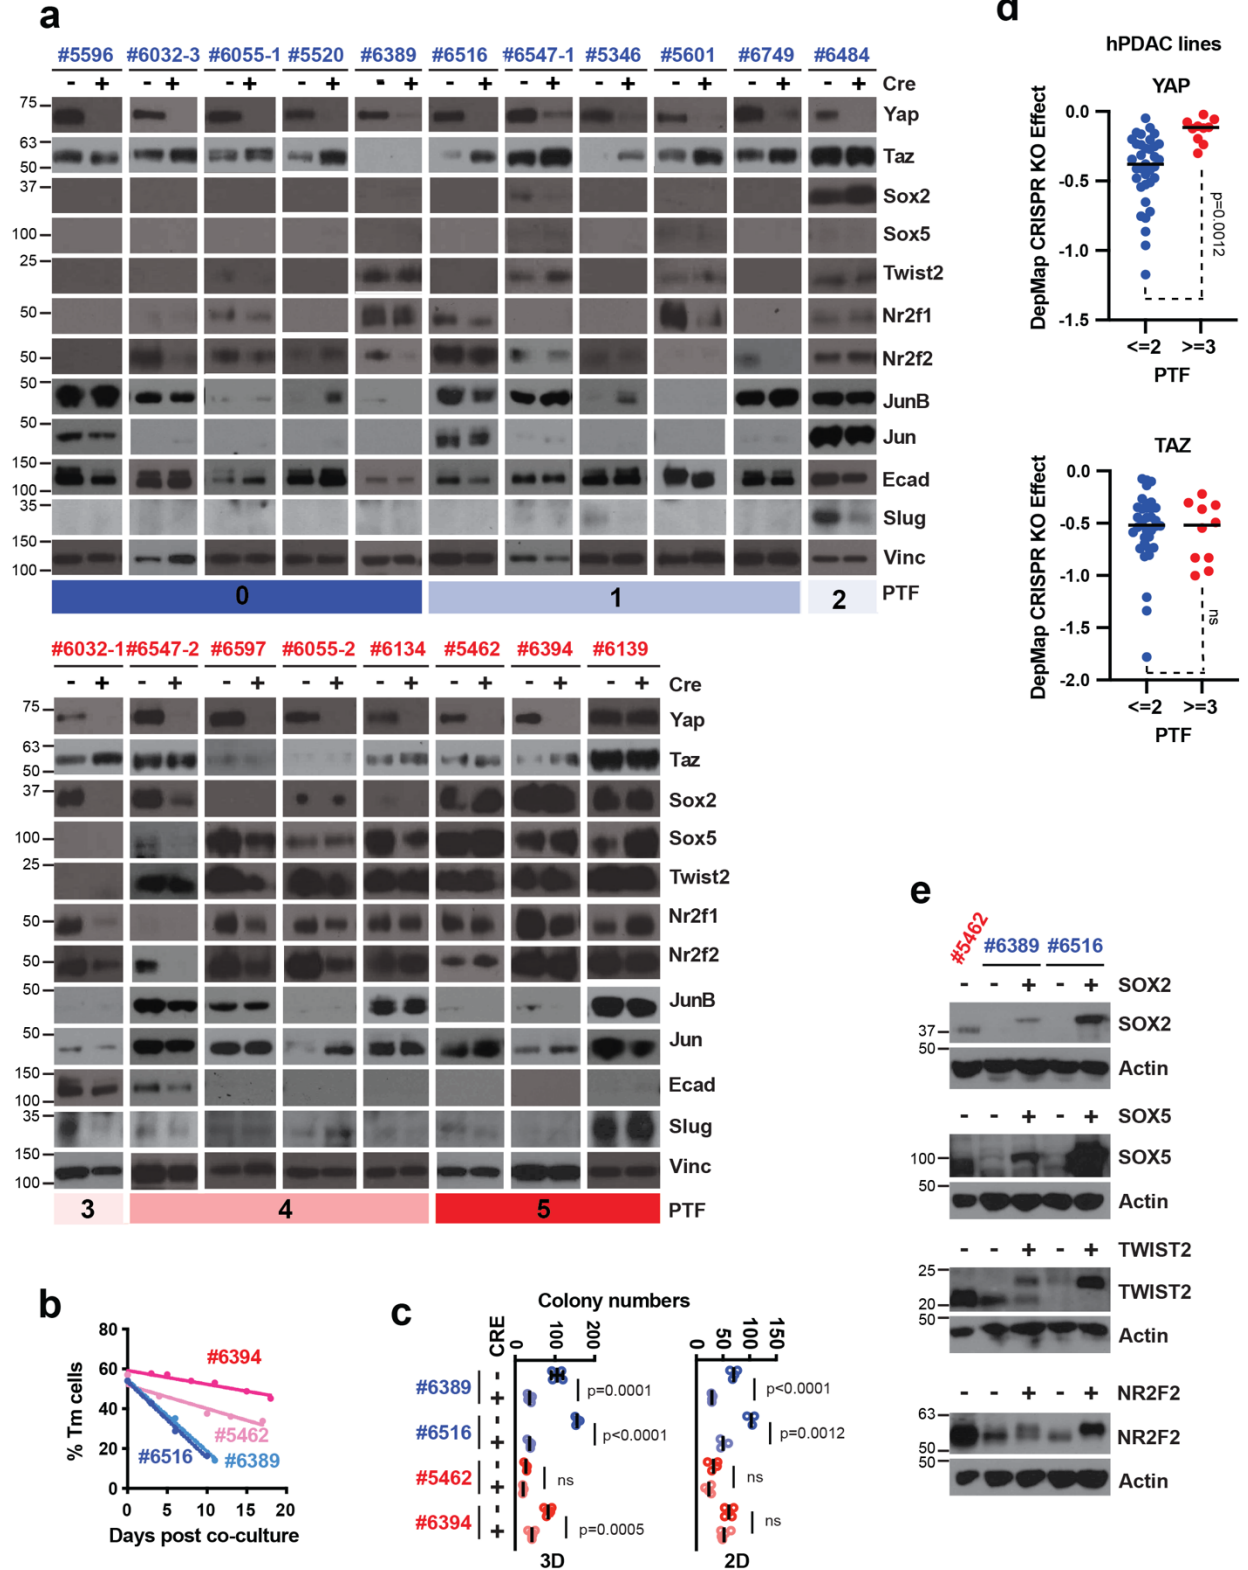

**Supplementary Figure 5. PTF expression reduces PDAC cell dependency on Yap.** **a.** WB analysis of primary PDAC lines infected Ad-GFP (-) or Ad-Cre (+) with indicated antibodies. Font colors of mouse IDs represent the differentiation statuses of tumors and corresponding primary PDAC cells (EP: blue; Inter: grey; MS: red). PTF scores (PTF) are indicated by the bottom bars. Vinc was used as loading control. Shown is representative of three independent experiments. **b.** Representative linear regression graphs showing the changes over time in the ratios of Tm+Yap- cells in co-cultures of primary PDAC cells pre-treated with Ad-GFP or Ad-Cre as outlined in **Figure 3a**. **c.** Bar graphs showing average colony numbers from 2D or 3D colony formation assays of the indicated primary PDAC lines infected Ad-GFP (-) or Ad-Cre (+). 3D: #6389 (n=4 independent experiments), #6516 (n=3 independent experiments), #5462 (n=3 independent experiments), and #6394 (n=4 independent experiments) and 2D: #6389 (n=4 independent experiments), #6516 (n=3 independent experiments), #5462 (n=3 independent experiments), #6394 (n=5 independent experiments), respectively. Unpaired, two-tailed, Student's t-test. Data are presented as mean value +/- SEM. **d.** Dot plots showing the KO effects of YAP or TAZ in individual human PDAC cell lines with PTF scores  $\leq 2$  and  $\geq 3$  according to the DepMap 22Q2 CRISPR screen. Data are presented as mean value +/- SEM. **e.** WB analysis confirming the exogenous expression of indicated PTFs in #6389 and #6516 cells at comparable levels as their endogenous expression in #5462. Actin was used as loading control. Shown is representative of three independent experiments. Source data are provided as a Source Data file.

# Supplementary Figure 6

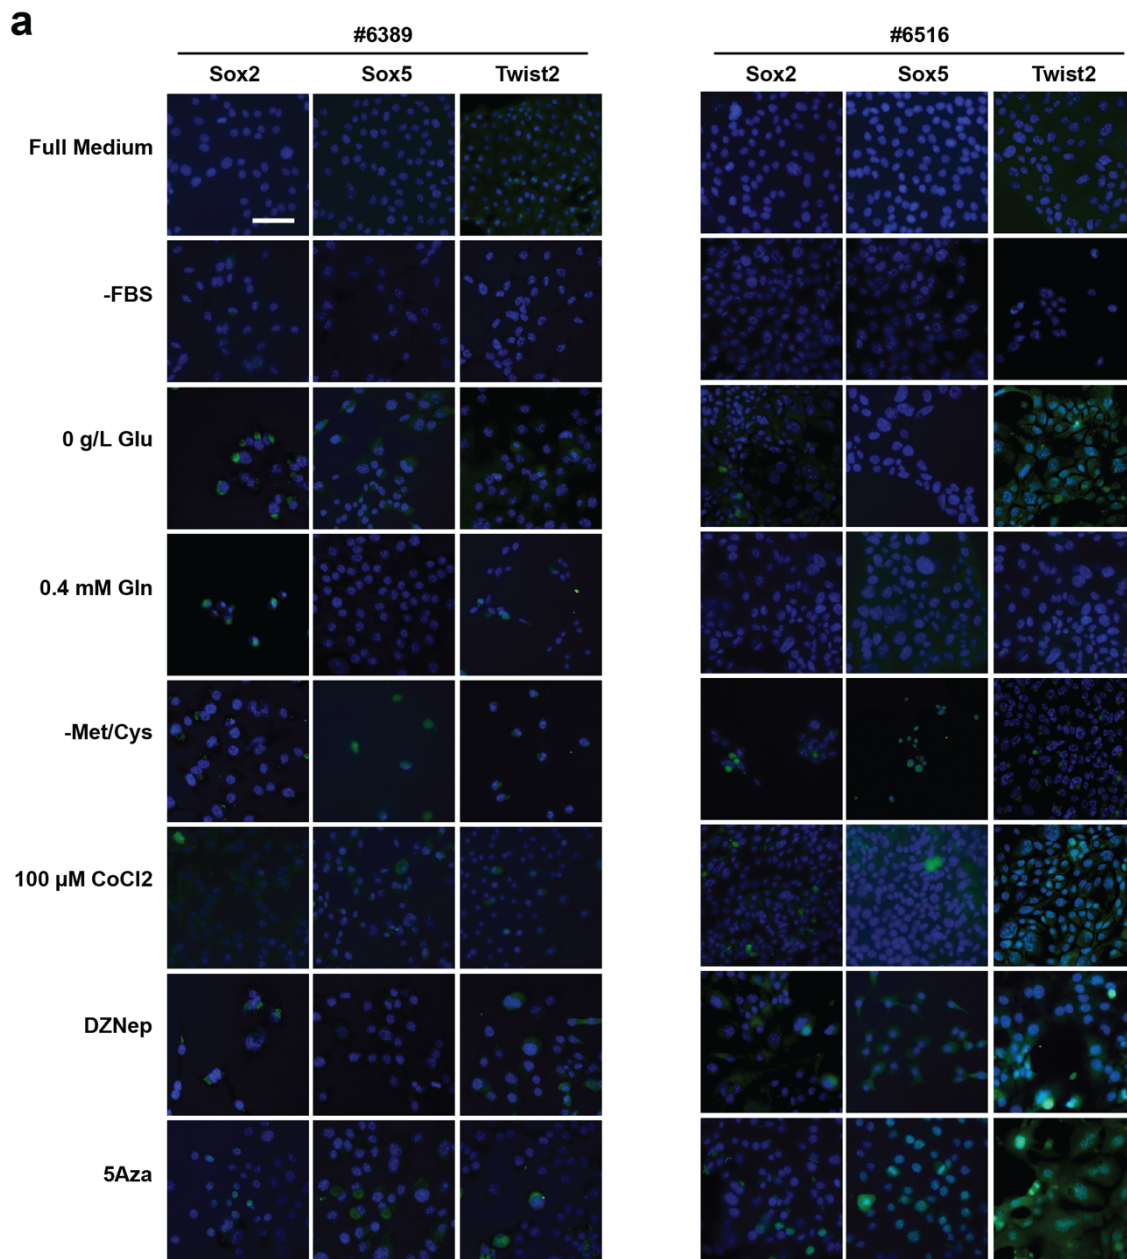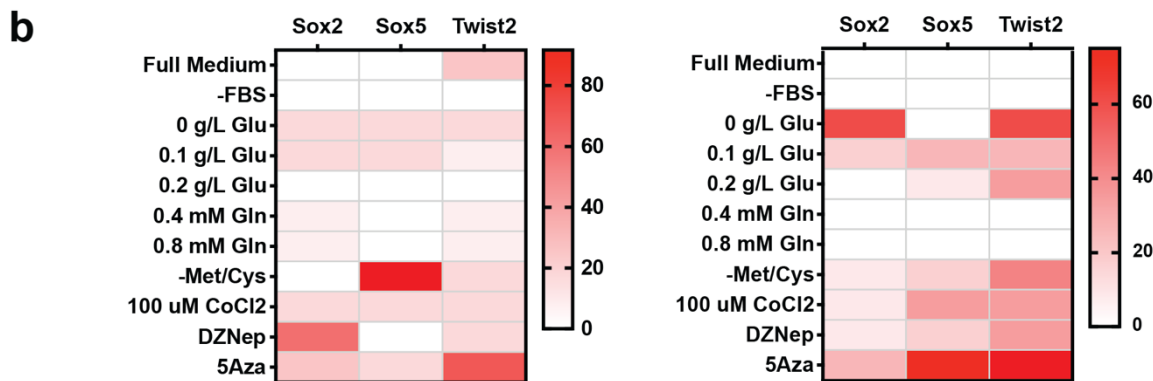

**Supplementary Figure 6. Nutrient deprivation, hypoxia and DNA/histone methylation inhibitors induce PTF expression in PDAC cells.** Representative images and heatmaps depicting the percentage of randomly selected 10x microscopic fields positive for Sox2, Sox5 or Twist2 according to IF analysis of #6389 and #6516 cells after 2 weeks of culturing under indicated conditions (n = 12 fields per condition). Scale bar indicates 200  $\mu$ m. Source data are provided as a Source Data file.



# Supplementary Figure 7

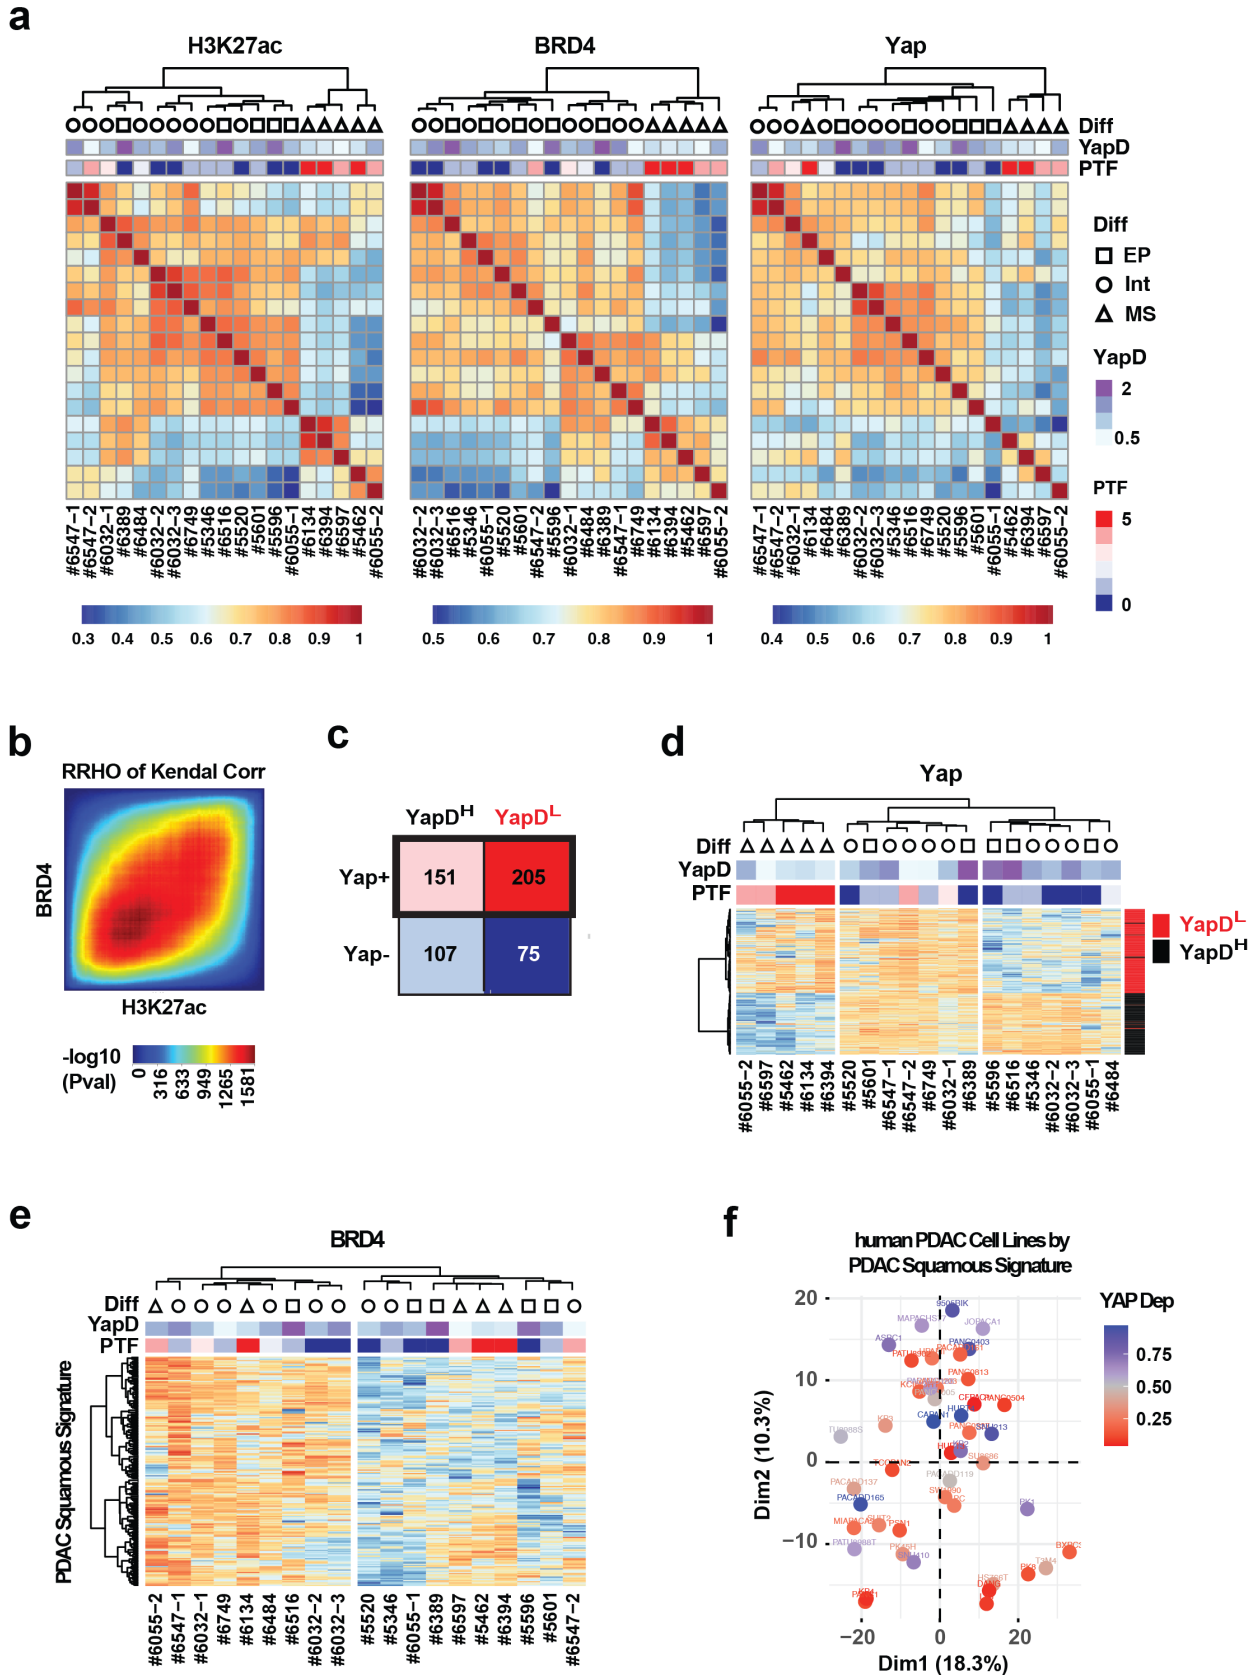

**Supplementary Figure /7. Global epigenetic reprogramming associated with EMT is linked to reduced dependency of PDAC cells on Yap.** **a.** Unsupervised clustering of all 19 primary PDAC lines based on pairwise Spearman correlation co-efficiencies of H3K27ac, BRD4 or Yap Cut&Tag signals across the entire genome. **b.** RRHO representation of Kendal correlation co-efficiencies calculated by comparing BRD4 and H3K27ac Cut&Tag signal variations for each genomic locus against the corresponding Yap dependency scores across all 19 primary PDAC lines. **c.** Heatmap depicting the overall Yap-binding statuses at genomic loci associated with either high (YapD<sup>H</sup>) or low (YapD<sup>L</sup>) Yap dependency from **Figure 3B**. **d.** Heatmap depicting unsupervised clustering of all 19 primary PDAC lines based on the signals of Yap Cut&Tag peaks overlapping the genomic loci associated with either high (YapD<sup>H</sup>, black bars, n=151) or low (YapD<sup>L</sup>, red bars, n=205) Yap dependency from **Figure 4B**. **e.** Heatmap depicting unsupervised clustering of all 19 primary PDAC lines based on the BRD4 Cut&Tag signals at the TSS sites corresponding to the PDAC squamous signature genes defined by Somerville et al. **f.** PCA plots segregating human PDAC lines based on the mRNA expression of PDAC squamous signature genes as shown in **e**. Each PDAC line is represented as a dot colored according to its YAP dependency score from the DepMap 22Q2 CRISPR screen. Source data are provided as a Source Data file.

# Supplementary Figure 8

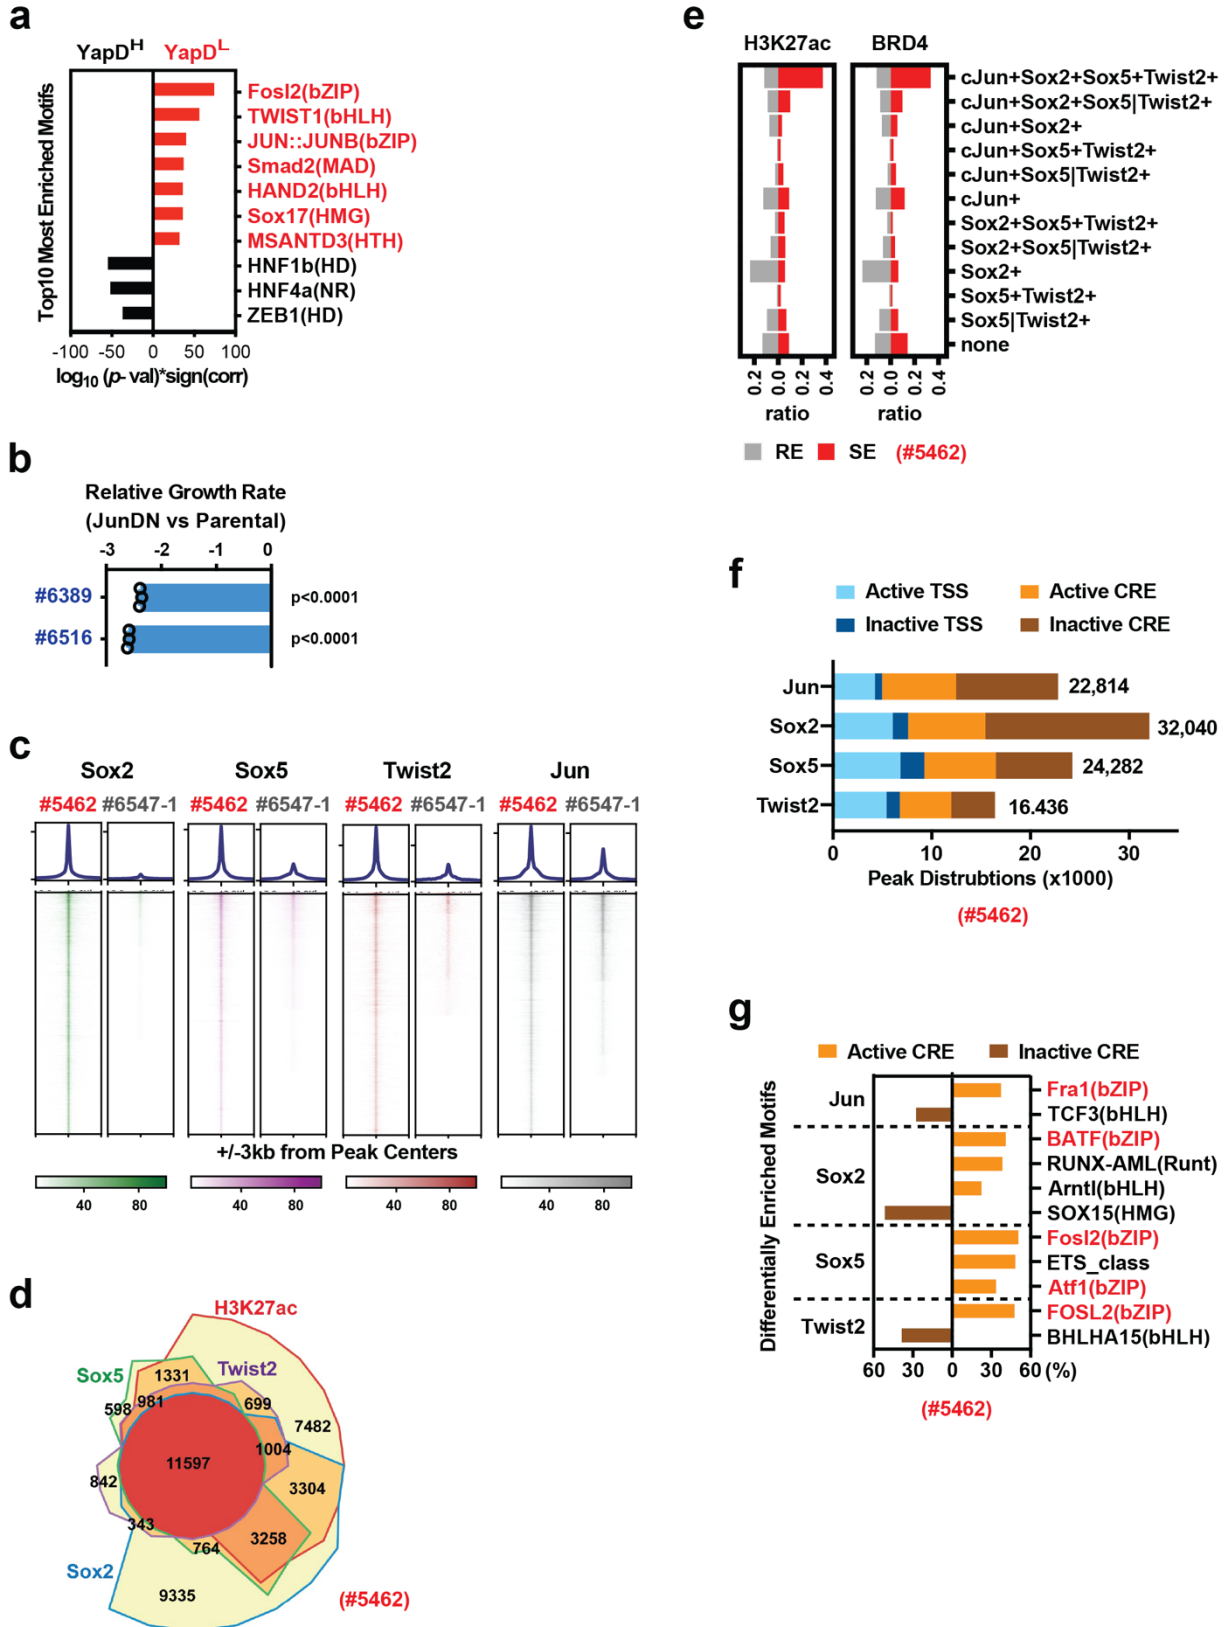

**Supplementary Figure 8. PTFs and Jun co-occupy active enhancer sites associated with**

**Yap independency.** **a.** Top10 most differentially enriched motifs according to HOMER differential motif enrichment analysis of BRD4 Cut&Tag peaks overlapping with genomic loci associated with either high (YapD<sup>H</sup>) or low (YapD<sup>L</sup>) Yap dependency from **Figure 4b.** **b.** Linear regression graphs showing the changes over time in the ratios of JunDN cells in co-cultures with parental primary PDAC cells as outlined in **Figure 3a.** n=3 independent experiments. Unpaired, two-tailed, Student's t-test. Data are presented as mean value +/- SEM. **c.** Cut&Tag signal heatmaps from the indicated antibodies within +/-3kb from the peak centers from PTF-high #5462 and PTF-low #6547-1 cells. **d.** Chow-Ruskey Venn diagram of the numbers of overlapping H3K27ac, Sox2, Sox5, and Twist2 Cut&Tag peaks in #5462 cells. **e.** Summary of the ratio of H3K27ac and BRD4 peaks at RE (gray) and SE (red) regions with different binding statuses by Jun, Sox2, Sox5, and/or Twist2 in #5462 cells. **f.** Peak distributions of each TF at active TSS (light blue), inactive TSS (dark blue), active CRE (light brown) and inactive CRE (dark brown) sites. **g.** Percentage of peaks containing the top most differentially enriched motifs according to HOMER differential motif enrichment analysis between Jun, Sox2, Sox5 or Twist2 peaks overlapping with active (light brown) or inactive (dark brown) CRE sites from **f.** Source data are provided within a Source Data file. Cut&Tag data are deposited in the GEO database under accession code GSE224566.

# Supplementary Figure 9

**a**

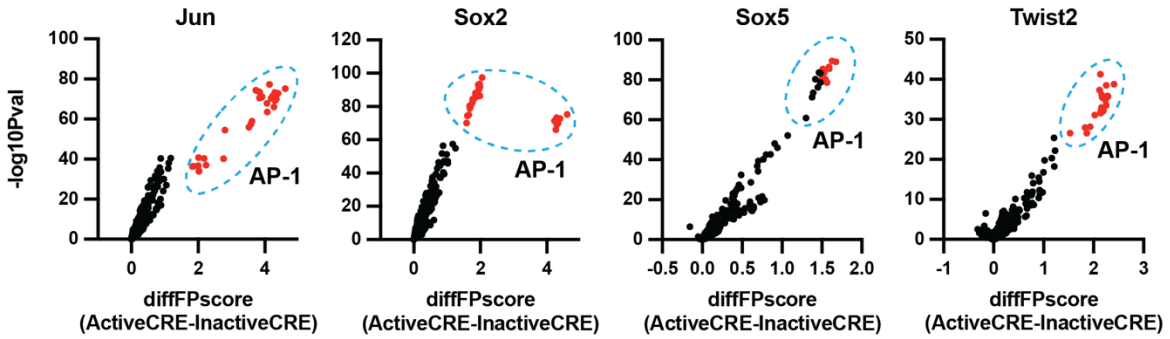

**b**

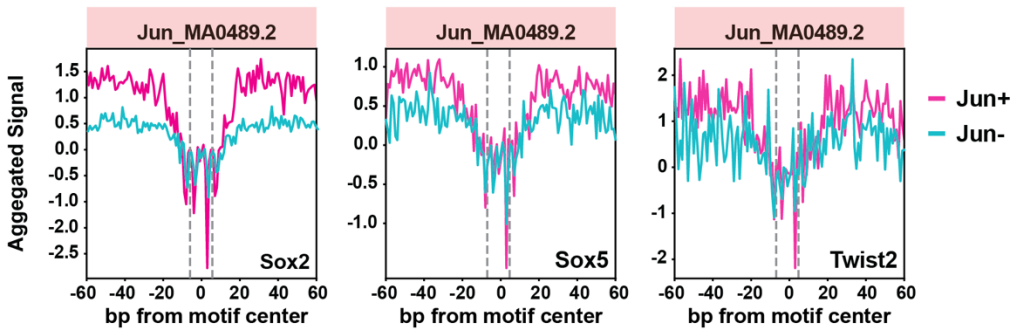

**c**

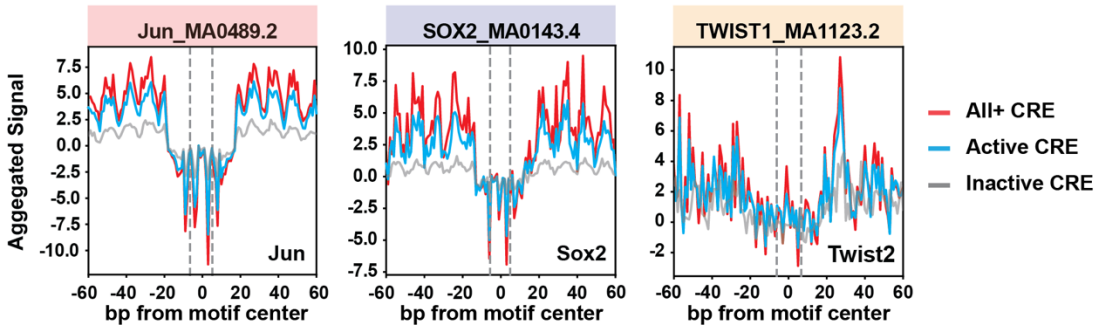

**d**

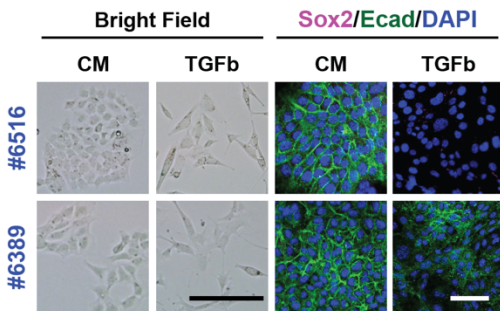

**e**

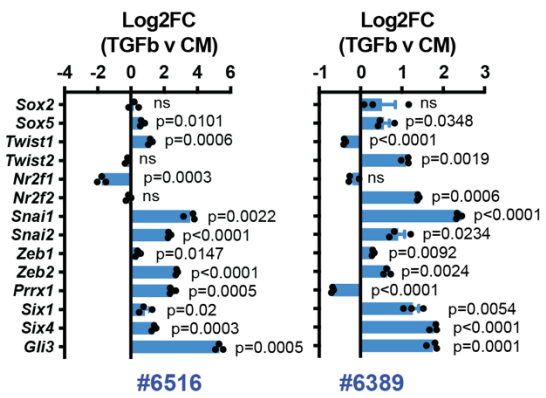



**Supplementary Figure 9. PTFs are recruited to AP-1 sites by Jun and cooperate with Jun**

**to activate transcription. a.** Differential Jun, Sox2, Sox5, and Twist2 footprint scores

(diffFPscore) and the corresponding  $-\log_{10}$  P-values between active and inactive CRE at the sites of individual JASPAR motifs as determined by TOBIAS. Motifs with diffFPscore greater than 1.5 and  $-\log_{10}$  P-values greater than 20 are highlighted in red. Dots corresponding to the AP-1 family of motifs are circled by blue dashed lines. **b.** Aggregated signal centering the

Jun\_MA0489.2 motif (marked by grey dashed lines) within the Sox2, Sox5 or Twist2 peaks with (+, pink) or without (-, green) Jun co-binding. **c.** Aggregated signal centering the indicated motifs

(marked by grey dashed lines) within the Jun, Sox2, or Twist2 peaks at active (blue) or inactive CRE (gray), or CRE bound by Jun and all the PTFs (red). **d.** Representative brightfield (left

panel) and IF (right panel) images of Ecad (green) and Sox2 (purple) in indicated primary PDAC cells following extended treatments with TGFb or control medium. Scale bar indicates 50  $\mu\text{m}$  on the left panel and 100  $\mu\text{m}$  on the right panel. Shown is representative images from three

independent experiments. **e.** Log<sub>2</sub> FC in mRNA expression of indicated genes in indicated

PDAC cells treated with TGFb relative to control. n = 3 independent experiments. Unpaired, two-tailed, Student's t-test. Data are presented as mean value  $\pm$  SEM. Source data are provided within a Source Data file.

# Supplementary Figure 10

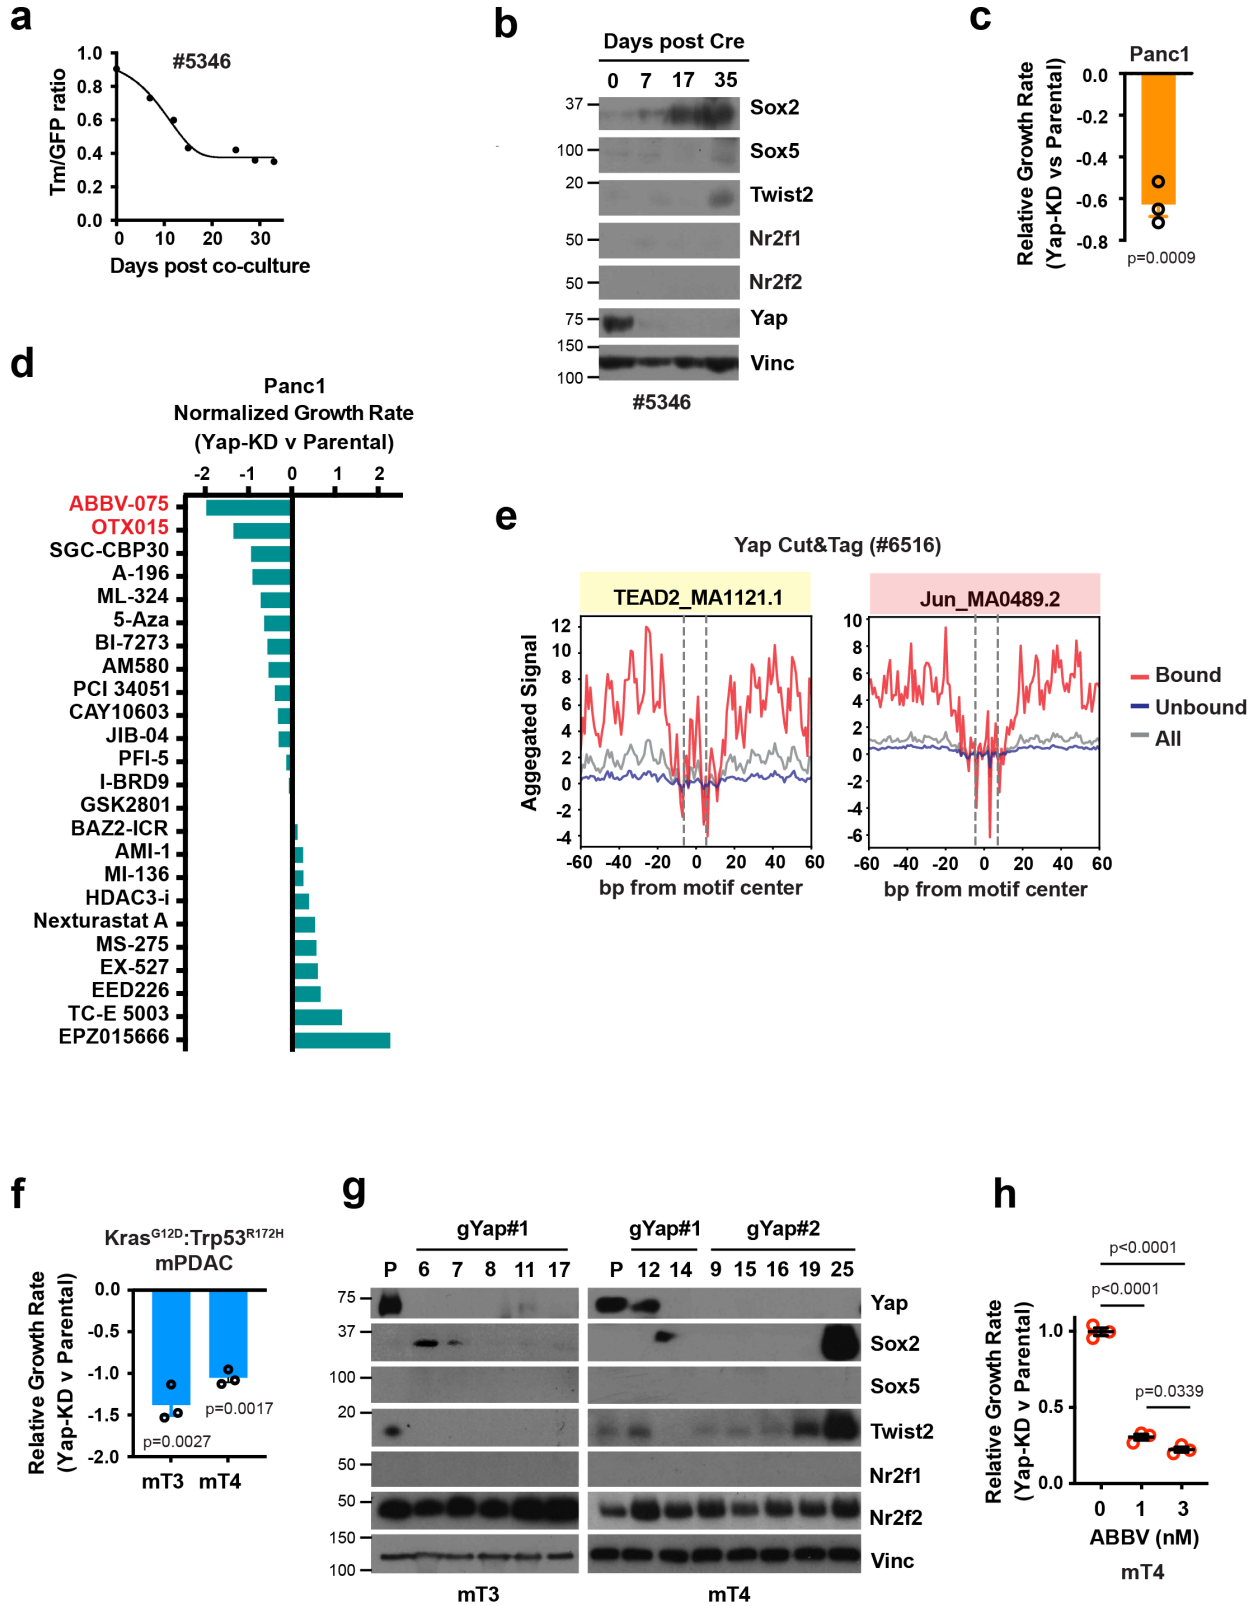

**Supplementary Figure 10. BET inhibitors sensitize human and murine PDAC cells to Yap inhibition in vitro and in vivo.** **a.** Changes in the ratios of #5346 cells pretreated with Ad-Cre (Tm+Yap-) or Ad-GFP (GFP+Yap-) and co-cultured over indicated time. **b.** WB of indicated proteins in #5346 cells at the indicated days post infection with Ad-CRE. Vinc was used as the loading control. Shown is representative of three independent experiments. **c.** Log<sub>2</sub> relative growth rates of Yap-KD versus parental Panc1 cells. n=3 independent experiments. Unpaired, two-tailed, Student's t-test. Data are presented as mean value +/- SEM. **d.** Log<sub>2</sub> relative growth rates of Yap-KD versus parental Panc1 cells co-cultured over a 2-month period in the presence of indicated epigenetic inhibitors normalized to DMSO. BET inhibitors are highlighted with red. **e.** Aggregated signals from bound (red), unbound (blue), or all (gray) Yap peaks centered on the indicated motif sites (marked by grey dashed lines) in #6516 cells. The total numbers of bound, unbound and all peaks for each motif are: TEAD2\_MA1121.1:711, 2492 and 3203; Jun\_MA0489.2: 798, 5481 and 6279. **f.** Log<sub>2</sub> relative growth rates of Yap-KD versus parental mT3 and mT4 cells. n=3 independent experiments. Data are presented as mean value +/- SEM. Unpaired, two-tailed, Student's t-test. **g.** WB analysis of indicated proteins in CRISPR Yap KO clones derived from mT3 and mT4 cells. Shown is representative of three independent experiments. **h.** Relative growth rate of Yap-KD to parental mT4 cells after co-culturing in the presence of indicated concentrations of ABBV-075. n=3 independent experiments. Data are presented as mean value +/- SEM. Unpaired, two-tailed, Student's t-test. Source data are provided within a Source Data file. Cut&Tag data are deposited in the GEO database under accession code GSE224566.

# Supplementary Figure 11

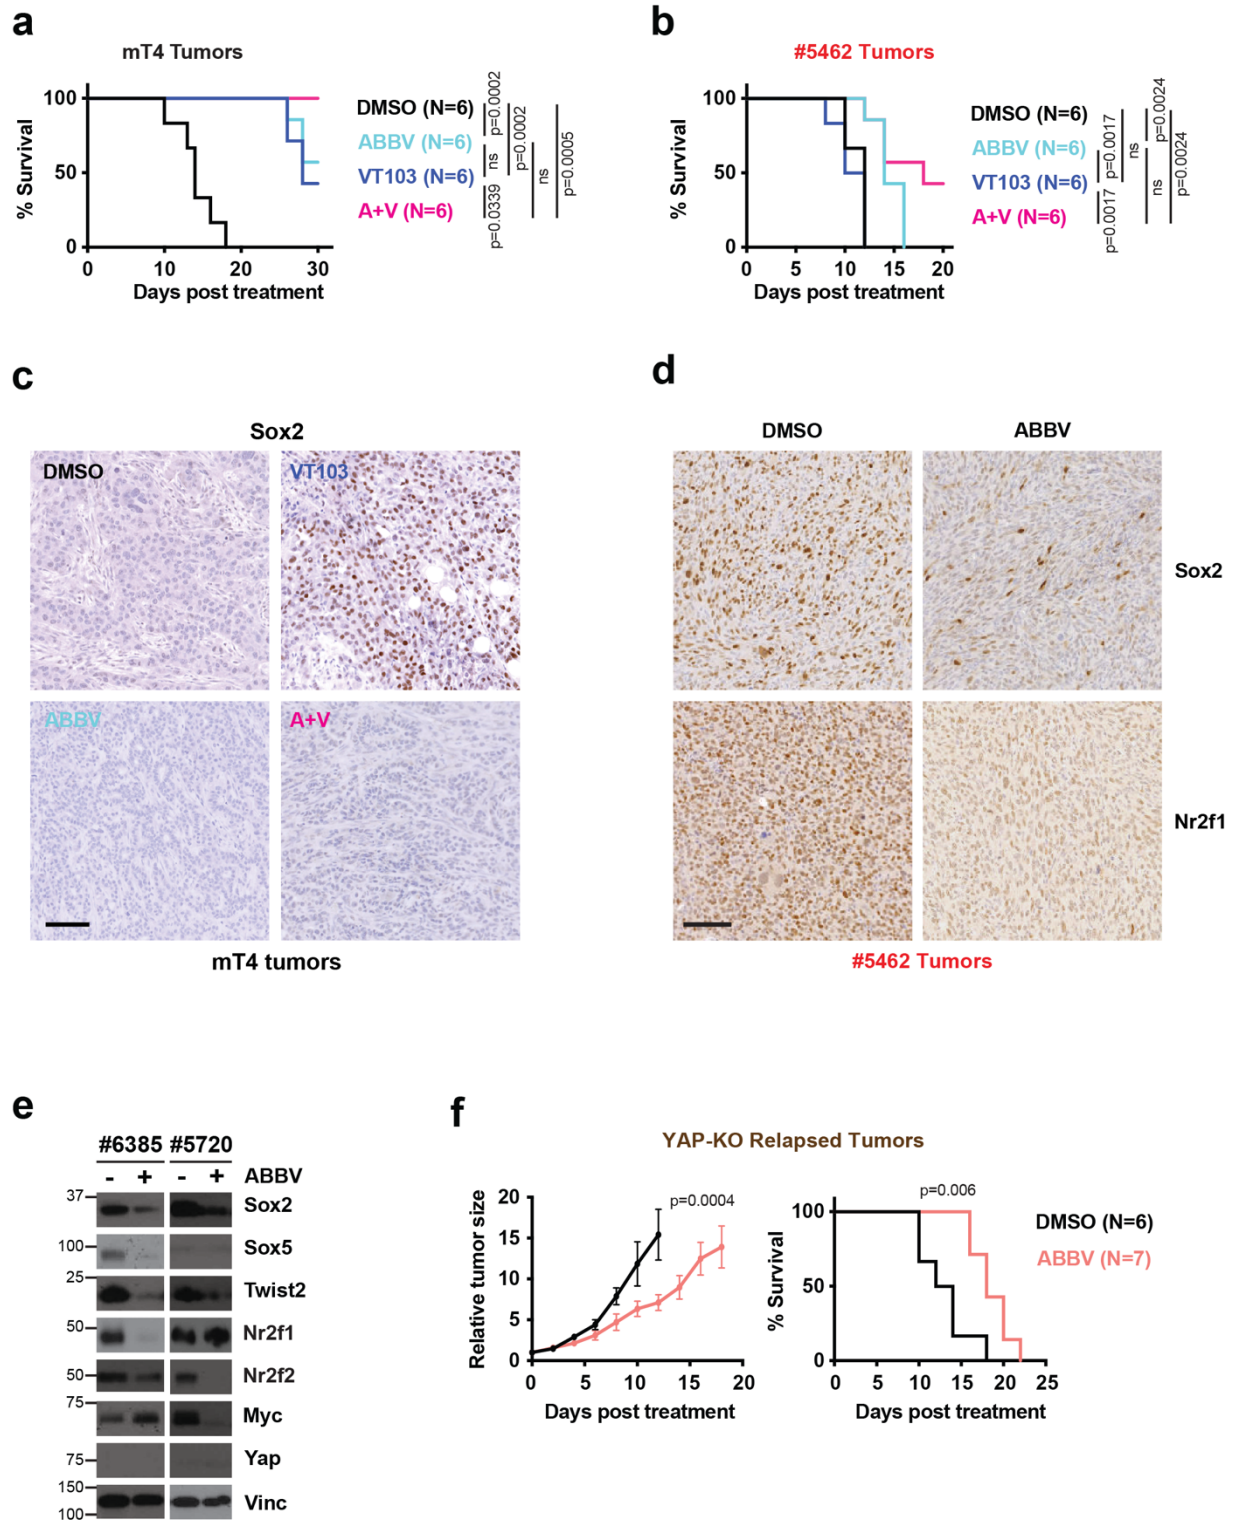

**Supplementary Figure 11. BET inhibitor ABBV-075 reduces PTF expression and the growth of Yap-independent murine PDAC tumors. a-b.** Kaplan-Meier survival curve of mice carrying subcutaneous xenografts derived from mT4 (**a**) and #5462 cells (**b**) treated with ABBV (light blue), VT103 (blue), ABBV+VT103 (A+V) (pink) or DMSO (black). n = 6 mice for each treatment arm. Log-rank (Mantel-Cox) test. **c-d.** Representative IHC images with indicated antibodies of mT4 (**c**) and #5462 (**d**) xenografts treated with treated with ABBV (light blue), VT103 (blue), ABBV+VT103 (A+V) (pink) or DMSO (black). Experiments were performed on three different mice from each treatment. Scale bar indicates 100  $\mu$ m. **e.** WB analysis of indicated proteins in two primary PDAC lines derived from relapsed Yap-KO tumors from TAM-treated KPYYF mice. Vinc was used as the loading control. Shown is representative of three independent experiments. **f.** Changes in relative tumor size (left) and overall survival (right) of nude mice bearing #6385 Yap-KO Relapsed xenografts treated with ABBV (red; n=7 mice) or DMSO (black; n=6 mice). Left: Two-way ANOVA test. Right: Log-rank (Mantel-Cox) test. Data are presented as mean value +/- SEM. Source data are provided as a Source Data file.



**Supplementary Table 1. The information of mice**

| <b>Tumor ID</b> | <b>Mouse ID</b> | <b>Gender</b> | <b>Genotype</b>                             | <b>Age (days)</b> | <b>TAM (days)</b> |
|-----------------|-----------------|---------------|---------------------------------------------|-------------------|-------------------|
| #6028-T00       | #6028           | Female        | KPF                                         | 121               | 4                 |
| #6028-T01       | #6028           | Female        | KPF                                         | 121               | 4                 |
| #6114-T00       | #6114           | Female        | KPF                                         | 41                | 6                 |
| #4921-T00       | #4921           | Female        | KPF                                         | 61                | 9                 |
| #4921-T01       | #4921           | Female        | KPF                                         | 61                | 9                 |
| #4921-T02       | #4921           | Female        | KPF                                         | 61                | 9                 |
| #4921-T03       | #4921           | Female        | KPF                                         | 61                | 9                 |
| #4921-T04       | #4921           | Female        | KPF                                         | 61                | 9                 |
| #6149-T00       | #6149           | Female        | KPF                                         | 116               | 11                |
| #5997-T00       | #5997           | Female        | KPF                                         | 143               | 23                |
| #5897-T00       | #5897           | Female        | KPF                                         | 149               | 30                |
| #5996-T00       | #5996           | Male          | KPF                                         | 152               | 32                |
| #4785-T00       | #4785           | Male          | KPF                                         | 106               | 36                |
| #4785-T01       | #4785           | Male          | KPF                                         | 106               | 36                |
| #4785-T02       | #4785           | Male          | KPF                                         | 106               | 36                |
| #4785-T03       | #4785           | Male          | KPF                                         | 106               | 36                |
| #4943-T00       | #4943           | Male          | KPF                                         | 149               | 79                |
| #5376-T00       | #5376           | Male          | KPYF                                        | 149               | 40                |
| #4808-T00       | #4808           | Female        | KPYF                                        | 77                | 43                |
| #5379-T00       | #5379           | Male          | KPYF                                        | 178               | 69                |
| #4852-T00       | #4852           | Male          | KPYF                                        | 150               | 72                |
| #5024-T00       | #5024           | Female        | KPYF                                        | 174               | 94                |
| #5136-T00       | #5136           | Male          | KPYF                                        | 178               | 102               |
| #4892-T00       | #4892           | Female        | KPYF<br>(Tm <sup>HYap</sup> <sup>KO</sup> ) | 122               | 36                |
| #8224-T00       | #8224           | Male          | KPYF<br>(Tm <sup>HYap</sup> <sup>KO</sup> ) | 109               | 48                |

|           |       |        |                                            |     |     |
|-----------|-------|--------|--------------------------------------------|-----|-----|
| #4449-T00 | #4449 | Female | KPYYF (Tm <sup>H</sup> Yap <sup>KO</sup> ) | 126 | 51  |
| #7783-T00 | #7783 | Female | KPYYF (Tm <sup>H</sup> Yap <sup>KO</sup> ) | 129 | 79  |
| #7783-T01 | #7783 | Female | KPYYF (Tm <sup>H</sup> Yap <sup>KO</sup> ) | 129 | 79  |
| #6385-T00 | #6385 | Male   | KPYYF (Tm <sup>H</sup> Yap <sup>KO</sup> ) | 222 | 132 |
| #6385-T01 | #6385 | Male   | KPYYF (Tm <sup>H</sup> Yap <sup>KO</sup> ) | 222 | 132 |
| #7641-T00 | #7641 | Female | KPYYF (Tm <sup>H</sup> Yap <sup>KO</sup> ) | 197 | 145 |
| #7641-T01 | #7641 | Female | KPYYF (Tm <sup>H</sup> Yap <sup>KO</sup> ) | 197 | 145 |
| #4697-T00 | #4697 | Female | KPYYF (Tm <sup>H</sup> Yap <sup>KO</sup> ) | 246 | 178 |
| #4697-T01 | #4697 | Female | KPYYF (Tm <sup>H</sup> Yap <sup>KO</sup> ) | 246 | 178 |
| #4697-T02 | #4697 | Female | KPYYF (Tm <sup>H</sup> Yap <sup>KO</sup> ) | 246 | 178 |
| #4697-T03 | #4697 | Female | KPYYF (Tm <sup>H</sup> Yap <sup>KO</sup> ) | 246 | 178 |
| #5720-T00 | #5720 | Female | KPYYF (Tm-Yap <sup>KO</sup> )              | 161 | 27  |
| #4455-T00 | #4455 | Female | KPYYF (Tm <sup>H</sup> Yap <sup>L</sup> )  | 61  | 6   |
| #6387-T00 | #6387 | Female | KPYYF (Tm <sup>H</sup> Yap <sup>L</sup> )  | 43  | 7   |
| #5601-T00 | #5601 | Male   | KPYYF (Tm <sup>H</sup> Yap <sup>L</sup> )  | 159 | 17  |
| #5601-T01 | #5601 | Male   | KPYYF (Tm <sup>H</sup> Yap <sup>L</sup> )  | 159 | 17  |
| #4641-T00 | #4641 | Female | KPYYF (Tm <sup>H</sup> Yap <sup>L</sup> )  | 63  | 26  |
| #4641-T01 | #4641 | Female | KPYYF (Tm <sup>H</sup> Yap <sup>L</sup> )  | 63  | 26  |
| #4891-T00 | #4891 | Female | KPYYF (Tm <sup>H</sup> Yap <sup>L</sup> )  | 115 | 29  |
| #4938-T00 | #4938 | Female | KPYYF (Tm <sup>H</sup> Yap <sup>L</sup> )  | 128 | 29  |
| #6365-T00 | #6365 | Male   | KPYYF (Tm <sup>H</sup> Yap <sup>L</sup> )  | 140 | 40  |
| #6365-T01 | #6365 | Male   | KPYYF (Tm <sup>H</sup> Yap <sup>L</sup> )  | 140 | 40  |
| #5522-T01 | #5522 | Male   | KPYYF (Tm <sup>H</sup> Yap <sup>L</sup> )  | 136 | 41  |
| #6928-T00 | #6928 | Female | KPYYF (Tm <sup>H</sup> Yap <sup>L</sup> )  | 127 | 58  |
| #6928-T01 | #6928 | Female | KPYYF (Tm <sup>H</sup> Yap <sup>L</sup> )  | 127 | 58  |
| #4516-T01 | #4516 | Male   | KPYYF (Tm <sup>H</sup> Yap <sup>L</sup> )  | 150 | 80  |
| #4610-T01 | #4610 | Female | KPYYF (Tm <sup>H</sup> Yap <sup>L</sup> )  | 205 | 141 |
| #6821-T00 | #6821 | Male   | KPYYF (Tm <sup>L</sup> Yap <sup>H</sup> )  | 80  | 2   |

|           |       |        |                                           |     |     |
|-----------|-------|--------|-------------------------------------------|-----|-----|
| #5346-T00 | #5346 | Male   | KPYYF (Tm <sup>+</sup> Yap <sup>H</sup> ) | 127 | 10  |
| #5596-T00 | #5596 | Female | KPYYF (Tm <sup>+</sup> Yap <sup>H</sup> ) | 155 | 13  |
| #5522-T00 | #5522 | Male   | KPYYF (Tm <sup>+</sup> Yap <sup>H</sup> ) | 136 | 41  |
| #7369-T00 | #7369 | Male   | KPYYF (Tm <sup>+</sup> Yap <sup>H</sup> ) | 133 | 67  |
| #4516-T00 | #4516 | Male   | KPYYF (Tm <sup>+</sup> Yap <sup>H</sup> ) | 150 | 80  |
| #4610-T00 | #4610 | Female | KPYYF (Tm <sup>+</sup> Yap <sup>H</sup> ) | 205 | 141 |

---

Supplementary Table 2. The HOMER motifs whose genomic locations were used to plot Sox2, Sox5, Twist2 and Jun Cut&Tag signals in Figure 5b.

| Homer Motif Name                                                       | Homer Motif Profile                                                                                           |
|------------------------------------------------------------------------|---------------------------------------------------------------------------------------------------------------|
| Sox2(HMG)/mES-Sox2-ChIP-Seq(GSE11431)/Homer (Motif 338)                |  <p>Reverse Opposite:</p>   |
| Sox6(HMG)/Myotubes-Sox6-ChIP-Seq(GSE32627)/Homer (Motif 341)           |  <p>Reverse Opposite:</p>   |
| Twist2(bHLH)/Myoblast-Twist2.Ty1-ChIP-Seq(GSE127998)/Homer (Motif 391) |  <p>Reverse Opposite:</p>  |
| AP-1(bZIP)/ThioMac-PU.1-ChIP-Seq(GSE21512)/Homer (Motif 1)             |  <p>Reverse Opposite:</p> |

**Supplementary Table 3. The list of epigenetic inhibitors**

| Inhibitor                | Concentration ( $\mu\text{M}$ ) |       |
|--------------------------|---------------------------------|-------|
|                          | mPDAC cells                     | Panc1 |
| 3-Deazaneplanoci (DZNep) | 1                               | None  |
| 5-Azacytidine            | 2                               | 0.66  |
| A-196                    | 10                              | 2.5   |
| ABBV-075                 | 0.005                           | 0.11  |
| AM580                    | 20                              | 20    |
| AMI-1                    | 0.5                             | 10    |
| AR-42 (OSU-HDAC42)       | 1                               | None  |
| BAZ2-ICR                 | 25                              | 25    |
| BI-7273                  | 1                               | 20    |
| BMS 493                  | 5                               | None  |
| BRD4884                  | 1.88                            | 2.5   |
| CAY10603                 | 1                               | 0.022 |
| EED226                   | 20                              | 6.66  |
| EPZ015666                | 20                              | 2.5   |
| EPZ6438                  | 1                               | None  |
| EX-527                   | 30                              | 2.5   |
| GSK126                   | 2                               | None  |
| GSK2801                  | 15                              | 15    |
| GSK6853                  | 20                              | None  |
| HDAC3 inhibitor          | 1                               | 20    |
| I-BRD9                   | 15                              | 10    |
| JIB-04                   | 0.375                           | 0.037 |
| LE 135                   | 4                               | None  |
| MI-136                   | 3.33                            | 2.5   |
| ML-324                   | 0.83                            | 1.66  |
| MM-102                   | 0.5                             | None  |
| MS-275                   | 10                              | 1     |
| MS023                    | 5                               | None  |
| Nexturastat A            | 2.5                             | 1     |
| OTX015                   | 0.25                            | 0.1   |
| Panobinostat             | 0.5                             | None  |
| PCI 24781                | 0.4                             | 0.125 |
| PCI 34051                | 20                              | 20    |
| PFI-3                    | 30                              | None  |
| PFI-5                    | 15                              | 15    |
| PRT4165                  | 72                              | None  |

|                      |      |      |
|----------------------|------|------|
| PTC-209              | 0.5  | None |
| SGC-CBP30            | 18   | 3    |
| SGC707               | 12.5 | None |
| TC-E 5002            | 30   | 30   |
| TC-E 5003            | 0.75 | 0.75 |
| Trichostatin A (TSA) | 0.2  | None |
| UNC0379              | 6.25 | 2.5  |

---



**Supplementary Table 4. The list of reagents and resources**

| <b>REAGENT or RESOURCE</b>                       | <b>SOURCE</b>                                             | <b>IDENTIFIER</b>                  |
|--------------------------------------------------|-----------------------------------------------------------|------------------------------------|
| <b>Antibodies</b>                                |                                                           |                                    |
| Chicken polyclonal anti-GFP                      | Abcam Cat#ab13970;<br>RRID:AB_300798                      | IHC 1:2000                         |
| Goat polyclonal anti-tdTomato                    | LifeSpan Cat#LS-C348313                                   | IHC 1:2000                         |
| Ki67 Rabbit polyclonal antibody                  | MilliporeSigma Cat#ab9260;<br>AB_RRID:2142366             | IHC 1:500                          |
| HNF-4 alpha/NR2A1 Rabbit polyclonal antibody     | NOVUS BIOLOGICALS<br>Cat#NBP1-89679                       | IHC 1:1000                         |
| CDH2 rat mAb                                     | DSHB Cat#MNCD2;<br>RRID:AB_528119                         | IHC 1:200                          |
| Mouse monoclonal Anti-E-Cadherin (clone36)       | BD Biosciences<br>Cat#610182;<br>RRID:AB_397581           | IHC 1:2000; IF<br>1:500; WB 1:2000 |
| Mouse monoclonal anti-Vinculin (Clone 7F9)       | Santa Cruz Biotechnology<br>Cat#sc-73614; RRID:AB_1131294 | WB 1:2000                          |
| Mouse monoclonal anti- $\beta$ -Actin (Clone C4) | Santa Cruz Biotechnology<br>Cat#sc-47778; RRID:AB_2714189 | WB 1:5000                          |
| ZEB1 (E2G6Y) XP Rabbit mAb                       | Cell Signaling Technology<br>Cat#70512                    | IHC 1:500                          |

|                                                |                                                            |                                                     |
|------------------------------------------------|------------------------------------------------------------|-----------------------------------------------------|
| JunB (C37F9) Rabbit mAb                        | Cell Signaling Technology<br>Cat#3753;<br>RRID:AB_2130002  | IHC 1:500; WB<br>1:1000                             |
| Rabbit monoclonal anti-c-Myc<br>(D3N8F)        | Cell Signaling Technology<br>Cat#13987;<br>RRID:AB_2631168 | WB 1:1000                                           |
| Rabbit polyclonal anti-YAP                     | Cell Signaling Technology<br>Cat#4912; RRID:AB_221891<br>1 | IHC 1:500; WB<br>1:1000; Cut&Tag<br>1:50            |
| Rabbit monoclonal anti-SOX2<br>(Clone D6D9)    | Cell Signaling Technology<br>Cat#5024;<br>RRID:AB_1904142  | IHC 1:500; IF<br>1:200; WB 1:1000;<br>Cut&Tag 1:50  |
| SOX5 Polyclonal antibody                       | Proteintech Cat#13216-1-<br>AP; RRID:AB=2196089            | IHC 1:500; IF<br>1:200; WB 1:1000;<br>Cut&Tag 1:50  |
| TWIST2 Polyclonal antibody                     | Proteintech Cat#11752-1-<br>AP; RRID:AB_2877791            | IHC 1:500; IF<br>1:200; WB 1:1000;<br>Cut&Tag 1:100 |
| COUP-TFI (D4H2) Rabbit mAb<br>antibody (NR2F1) | Cell Signaling Technology<br>Cat#6364;<br>RRID:AB_11220432 | IHC 1:500; WB<br>1:1000                             |
| COUP-TFII (D16C4) Rabbit<br>mAb (NR2F2)        | Cell Signaling Technology<br>Cat#6434;<br>RRID:AB_11220428 | IHC 1:500; WB<br>1:1000                             |
| ETS-1 (D8O8A) Rabbit mAb                       | Cell Signaling Technology<br>Cat#14069                     | WB 1:1000                                           |
| MAF polyclonal antibody                        | Proteintech Cat#55013-1-<br>AP; RRID:AB_10863127           | WB 1:1000                                           |

|                                                      |                                                          |                              |
|------------------------------------------------------|----------------------------------------------------------|------------------------------|
| SIX4 polyclonal antibody                             | Proteintech Cat#21305-1-AP; RRID:AB_10860258             | WB 1:1000                    |
| PRX (Prrx1; C-6) antibody                            | Santa Cruz Biotechnology Cat#sc-271047; RRID:AB_10611937 | WB 1:1000                    |
| p40 Mouse monoclonal antibody                        | BIOCARE MEDICAL Cat#ACI 3066 A; RRID:AB_2858274          | IHC 1:500                    |
| Rat monoclonal anti-Keratin, type I; cytokeratin 19  | DSHB Cat#TROMA-III; RRID:AB_2133570                      | IHC 1:500; WB 1:2000         |
| Rabbit Anti-BRD4 antibody                            | Sigma-Aldrich Cat#HPA015055; RRID:AB_1845435"            | Cut&Tag 1:50                 |
| Anti-acetyl-Histone H3 (Lys27) Antibody              | MilliporeSigma Cat#07-360; RRID:AB_310550                | Cut&Tag 1:50                 |
| Anti-trimethyl-Histone H3 (Lys4) Antibody            | MilliporeSigma Cat#07-473; RRID:AB_1977252               | Cut&Tag 1:100                |
| c-Jun (60A8) Rabbit mAb antibody                     | Cell Signaling Technology Cat#9165; RRID:AB_2130165      | WB 1:1000; Cut&Tag 1:100     |
| Anti-rabbit IgG, HRP-linked Antibody                 | Cell Signaling Technology Cat#7074                       | WB 1:5000                    |
| Anti-mouse IgG, HRP-linked Antibody                  | Cell Signaling Technology Cat#7076                       | WB 1:5000                    |
| <b>Chemicals, Peptides, and Recombinant Proteins</b> |                                                          |                              |
| 5-Azacytidine                                        | ApexBio                                                  | Cat#A1907; CAS: 320-67-2     |
| ABBV-075                                             | Cayman                                                   | Cat#21033; CAS: 1445993-26-9 |

|                |        |                                 |
|----------------|--------|---------------------------------|
| OTX015         | Cayman | Cat#15947; CAS:<br>202590-98-5  |
| JQ1            | Cayman | Cat#11187; CAS:<br>1268524-70-4 |
| ML-324         | Cayman | Cat#17472; CAS:<br>1222800-79-4 |
| PRT4165        | Cayman | Cat#19093; CAS:<br>31083-55-3   |
| MI-136         | Cayman | Cat#19245; CAS:<br>1628316-74-4 |
| TC-E 5003      | Cayman | Cat#17718; CAS:<br>17328-16-4   |
| PFI-3          | Cayman | Cat#15267; CAS:<br>1819363-80-8 |
| UNC0379        | Cayman | Cat#16400; CAS:<br>1620401-82-2 |
| PFI-5          | Cayman | Cat#15267; CAS:<br>1819363-80-8 |
| Trichostatin A | Cayman | Cat#89730; CAS:<br>58880-19-6   |
| GSK126         | Cayman | Cat#15415; CAS:<br>1346574-57-9 |
| GSK484         | Cayman | Cat#17488; CAS:<br>1652591-81-5 |
| MM-102         | Cayman | Cat#17699; CAS:<br>1417329-24-8 |
| TP-472         | Cayman | Cat#20030; CAS:<br>2079895-62-6 |
| BRD4884        | Cayman | Cat#19834; CAS:<br>1404559-91-6 |
| BMS 453        | Cayman | Cat#19076; CAS:<br>166977-43-1  |
| UNC3866        | Cayman | Cat#19237; CAS:<br>1872382-47-2 |
| CD2665         | Cayman | Cat#16031; CAS:<br>170355-78-9  |

|            |                |                                     |
|------------|----------------|-------------------------------------|
| MI192      | Cayman         | Cat#18288; CAS:<br>1415340-63-4     |
| DZNep      | Cayman         | Cat#13828; CAS:<br>102052-95-9      |
| TC-E 5002  | Cayman         | Cat#17717; CAS:<br>1453071-47-0     |
| (R)-PFI-2  | Cayman         | Cat#14678; CAS:<br>1627607-87-7     |
| EPZ5676    | Cayman         | Cat#16175; CAS:<br>1380288-87-8     |
| BAY-6035   | Cayman         | Cat#25925; CAS:<br>2247890-13-5     |
| UNC1215    | Cayman         | Cat#13968; CAS:<br>1415800-43-9     |
| C646       | Cayman         | Cat#10549; CAS:<br>328968-36-1      |
| JIB-04     | Cayman         | Cat#15338; CAS:<br>199596-05-9      |
| CAY10603   | Cayman         | Cat#13146; CAS:<br>1045792-66-2     |
| Furamidine | Cayman         | Cat#19121; CAS:<br>55368-40-6       |
| BI-7273    | Cayman         | Cat#20311; CAS:<br>1883429-21-7     |
| SGC3027    | SGC            | Cat#6825;<br>CAS:None               |
| GSK-LSD1   | Cayman         | Cat#16439; CAS:<br>2102933-95-7     |
| MRK-740    | MedChemExpress | Cat#HY-114209;<br>CAS: 2387510-80-5 |
| NI-57      | Cayman         | Cat#17662; CAS:<br>1883548-89-7     |
| GSK6853    | Cayman         | Cat#20985; CAS:<br>1910124-24-1     |
| AR-42      | Cayman         | Cat#17531; CAS:<br>1798310-55-0     |

|            |                |                                   |
|------------|----------------|-----------------------------------|
| AM580      | Cayman         | Cat#15261; CAS:<br>102121-60-8    |
| BIX 01294  | Cayman         | Cat#13124; CAS:<br>1808255-64-2   |
| OICR-9429  | Cayman         | Cat#16095; CAS:<br>1801787-56-3   |
| BAZ2-ICR   | Cayman         | Cat#17448; CAS:<br>1665195-94-7   |
| EED226     | Cayman         | Cat#22031; CAS:<br>2083627-02-3   |
| EPZ015666  | Cayman         | Cat#17285; CAS:<br>1616391-65-1   |
| EPZ020411  | Cayman         | Cat#19160; CAS:<br>1700663-41-7   |
| PTC-209    | Cayman         | Cat#16277; CAS:<br>315704-66-6    |
| MS-275     | Cayman         | Cat#13284; CAS:<br>209783-80-2    |
| TMP269     | Cayman         | Cat#17738; CAS:<br>1314890-29-3   |
| EX-527     | Cayman         | Cat#10009798;<br>CAS: 49843-98-3  |
| SGC707     | Cayman         | Cat#17017; CAS:<br>1687736-54-4   |
| AMI-1      | Cayman         | Cat#13965; CAS:<br>None           |
| BMS493     | Cayman         | Cat#17418; CAS:<br>215030-90-3    |
| Panobistat | MedChemExpress | Cat#HY-10224;<br>CAS: 404950-80-7 |
| PCI 34051  | Cayman         | Cat#10444; CAS:<br>950762-95-5    |
| A-196      | Cayman         | Cat#18317; CAS:<br>1982372-88-2   |
| LE 135     | Cayman         | Cat#14415; CAS:<br>155877-83-1    |



|                                    |                          |                                      |
|------------------------------------|--------------------------|--------------------------------------|
| Nextrastat A                       | Cayman                   | Cat#71462653;<br>CAS No.1403783-31-2 |
| GSK2801                            | Cayman                   | Cat#14120; CAS:<br>1619994-68-1      |
| GSK-J4                             | Cayman                   | Cat#12073; CAS:<br>1797983-09-5      |
| MS023                              | Cayman                   | Cat#34786; CAS:<br>1831110-54-3      |
| BRD73954                           | Cayman                   | Cat#16919; CAS:<br>1440209-96-0      |
| PCI24781                           | Cayman                   | Cat#20059; CAS:<br>783355-60-2       |
| SGC-CBP30                          | Cayman                   | Cat#14469; CAS:<br>1613695-14-9      |
| I-BRD9                             | Cayman                   | Cat#17749; CAS:<br>1714146-59-4      |
| EPZ6438                            | Cayman                   | Cat#16174; CAS:<br>1403254-99-8      |
| Vivace102 (V102)                   | Vivace Therapeutics      | None                                 |
| Puromycin                          | Thermo Fisher Scientific | Cat# A1113803                        |
| Doxycycline hydrochloride          | Alfa Aesar               | Cat#J60422; CAS:<br>10592-13-9       |
| TGFb1                              | MedChemExpress           | HY-P7117                             |
| <b>Critical Commercial Assays</b>  |                          |                                      |
| GoTaq® Green Master Mix            | Promega                  | Cat#M7122                            |
| ImmPACT DAB EqV HRP substrate      | Vector Laboratories      | Cat#SK-4103                          |
| IMMPRESS HRP Polymer Detection Kit | Vector Laboratories      | Cat#MP-7401, MP-7402, MP-7405        |
| iScript cDNA Synthesis Kit         | Bio-Rad                  | Cat#1708890                          |
| iTaq Universal SYBR Green Supermix | Bio-Rad                  | Cat#1725124                          |

|                                               |                                                     |                            |
|-----------------------------------------------|-----------------------------------------------------|----------------------------|
| Pierce BCA Protein Assay Kit                  | Thermo Fisher Scientific                            | Cat#23225                  |
| PrepEase Genomic DNA isolation kit            | Affymetrix                                          | Cat#78855                  |
| RNAeasy Mini Kit                              | Qiagen                                              | Cat#74104                  |
| Tyramide Signal Amplification (TSA) kit       | Thermo Fisher Scientific                            | Cat#T20932, T20933, T20936 |
| NEBNext HiFi 2x PCR Master mix                | NEB                                                 | Cat#M0541                  |
| BioMag®Plus Concanavalin A                    | Bangs Laboratories                                  | Cat#BP531                  |
| Mag-Bind® TotalPure NGS beads                 | Omega Bio Tech                                      | Cat#M1378                  |
| <b>Experimental Models: Cell Lines</b>        |                                                     |                            |
| Panc1                                         | ATCC                                                | CRL-1469                   |
| 293T                                          | ATCC                                                | CRL-3216                   |
| mT3 and mT4                                   | Sylvia F.Boj ea al., 2015                           | N/A                        |
| Primary mPDAC (KP)                            | This paper                                          | N/A                        |
| Primary mPDAC (KPYY)                          | This paper                                          | N/A                        |
| <b>Experimental Models: Organisms/Strains</b> |                                                     |                            |
| Athymic Nude Mouse                            | Charles River Laboratories (Croy and Chapeau, 1990) | Strain code #553           |
| CL57/BL6 mice                                 | Charles River Laboratories (Croy and Chapeau, 1990) | Strain code #027           |
| Genetically engineered mouse strains          | (Schönhuber et al., 2014)<br>(Zhang et al., 2010)   | N/A                        |
| <b>Recombinant DNA</b>                        |                                                     |                            |
| pTRIPZ lentiviral vector                      | GE Healthcare Dharmacon, Inc.                       | Cat#RHS4740                |
| LentiCrispr v2                                | Addgene                                             | Cat#52961                  |
| pCW57-MCS1-2A-MCS2                            | Addgene                                             | Cat##71782                 |

|                                                     |                                 |                      |
|-----------------------------------------------------|---------------------------------|----------------------|
| Ad-CMV-GFP                                          | lowa viral vector core          | Cat#lowa-1174        |
| Ad-CMV-CRE                                          | lowa viral vector core          | Cat#lowa-5           |
| pLenti6.2-V5-TWIST2                                 | DNASU                           | Cat#HsCD0033033<br>1 |
| pLX304-SOX2                                         | DNASU                           | Cat#HsCD0043632<br>8 |
| pLX304-SOX5                                         | DNASU                           | Cat#HsCD0044263<br>8 |
| pDNR-Dual-NR2F2                                     | DNASU                           | Cat#HsCD0000521<br>5 |
| pCW57-SOX2                                          | This paper                      | N/A                  |
| pCW57-SOX5                                          | This paper                      | N/A                  |
| pCW57-TWIST2                                        | This paper                      | N/A                  |
| pCW57-NR2F2                                         | This paper                      | N/A                  |
| pTRIPZ-shSox2                                       | This paper                      | N/A                  |
| pTRIPZ-shSox5#1                                     | This paper                      | N/A                  |
| pTRIPZ-Sox5#2                                       | This paper                      | N/A                  |
| pTRIPZ-shTwist2#1                                   | This paper                      | N/A                  |
| pTRIPZ-shTwist2#2                                   | This paper                      | N/A                  |
| pTRIPZ-shNr2f1#1                                    | This paper                      | N/A                  |
| pTRIPZ-shNr2f1#2                                    | This paper                      | N/A                  |
| pTRIPZ-shNr2f2#1                                    | This paper                      | N/A                  |
| pTRIPZ-shNr2f2#2                                    | This paper                      | N/A                  |
| TLCV2-sgNr2f2#1                                     | This paper                      | N/A                  |
| TLCV2-sgNr2f2#2                                     | This paper                      | N/A                  |
| 3XFlag-pA-Tn5                                       | Addgene                         | Cat#124601           |
| <b>Oligonucleotides</b>                             |                                 |                      |
| Mouse Sox2_shRNA 5'<br>CGAGATAAACATGGCAATCA<br>A 3' | Broad TRC RNAi shRNA<br>library | TRCN0000085748       |
| Mouse Sox5_shRNA 5'<br>ATGGAAGTCGATGGCAATAA<br>A 3' | Broad TRC RNAi shRNA<br>library | TRCN0000421409       |

|                                                       |                                 |                |
|-------------------------------------------------------|---------------------------------|----------------|
| Mouse Twist2_shRNA 5'<br>AGCAAGAAATCGAGCGAAGA<br>T 3' | Broad TRC RNAi shRNA<br>library | TRCN0000086085 |
| Mouse Nr2f1_shRNA 5'<br>GTCCGCAGGAACTTAACTTA<br>C 3'  | Broad TRC RNAi shRNA<br>library | TRCN0000350649 |
| Mouse Nr2f2_shRNA 5'<br>CTCGTACCTGTCCGGATATA<br>T 3'  | Broad TRC RNAi shRNA<br>library | TRCN0000054475 |
