# Supplementary material for: Spontaneously evolved progenitor niches escape Yap oncogene addiction in advanced pancreatic ductal adenocarcinomas
Source: PubMed Central journal article supplement (PMC10017707; doi:10.1038/s41467-023-37147-y), 2023-03-15
Supplement: 41467_2023_37147_MOESM2_ESM.pdf [file 41467_2023_37147_MOESM2_ESM.pdf]

## **Description of Additional File name: Supplementary Files**

File name: **Supplementary Software 1**

Description: Row code used in RNA-seq and Cut&Tag data analysis.
